# Supplementary material for: NF-κB Immunity in the Brain Determines Fly Lifespan in Healthy Aging and Age-Related Neurodegeneration
Source: PubMed Central journal article supplement (PMC5413584; doi:10.1016/j.celrep.2017.04.007), 2017-04-25
Supplement: mmc8.pdf [file mmc8.pdf]

## NF- $\kappa$ B Immunity in the Brain Determines Fly Lifespan in Healthy Aging and Age-Related Neurodegeneration

### Graphical Abstract

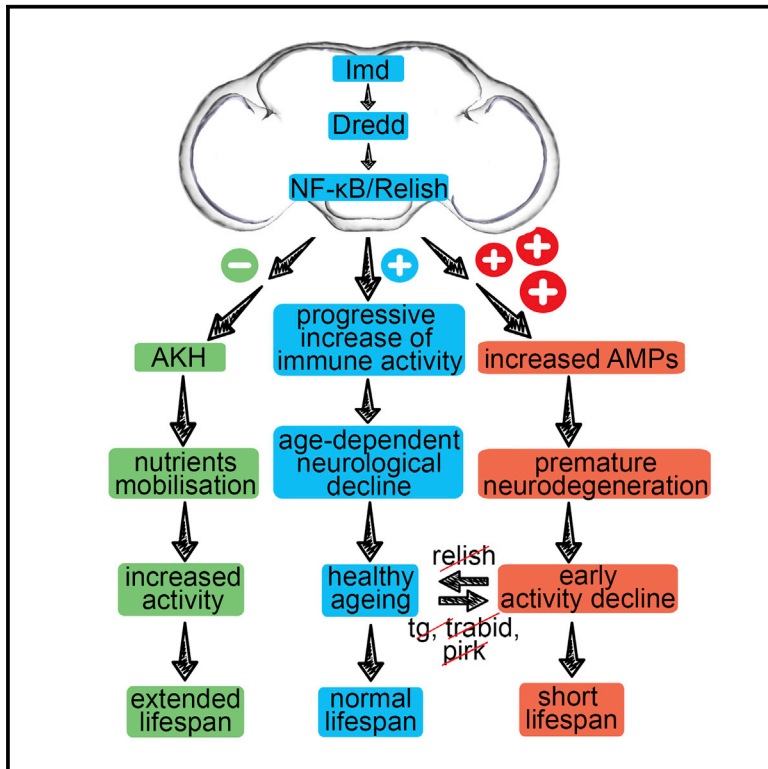

### Authors

Ilias Kounatidis, Stanislava Chtarbanova, Yang Cao, Margaret Hayne, Dhruv Jayanth, Barry Ganetzky, Petros Ligoxygakis

### Correspondence

petros.ligoxygakis@bioch.ox.ac.uk

### In Brief

In humans, both healthy aging and age-dependent neurodegeneration are accompanied by an upregulation of innate immunity. What is the cause and what is the consequence remain unclear. Kounatidis et al. show that, in flies, NF- $\kappa$ B immune signaling controls lifespan in healthy flies, as well as in those predisposed to early neurodegeneration.

### Highlights

- Constitutive immunity predisposes to short lifespan with severe neurodegeneration
- Blocking constitutive immunity in glia rescues predisposed flies
- Suppression of immunity in glia of healthy flies triggers adipokinetic signaling
- This immune-endocrine axis mobilizes nutrients and extends active lifespan

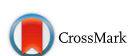

# NF- $\kappa$ B Immunity in the Brain Determines Fly Lifespan in Healthy Aging and Age-Related Neurodegeneration

Ilias Kounatidis,<sup>1,3</sup> Stanislava Chtarbanova,<sup>2,3,4</sup> Yang Cao,<sup>2</sup> Margaret Hayne,<sup>2</sup> Dhruv Jayanth,<sup>1</sup> Barry Ganetzky,<sup>2</sup> and Petros Ligoxygakis<sup>1,5,\*</sup>

<sup>1</sup>Cell Biology, Development, and Genetics Laboratory, Department of Biochemistry, University of Oxford, South Park Road, Oxford OX1 3QU, UK

<sup>2</sup>Laboratory of Genetics, 425-G Henry Mall, University of Wisconsin, Madison, WI 53706-1580, USA

<sup>3</sup>These authors contributed equally

<sup>4</sup>Present address: Department of Biological Sciences, University of Alabama, Tuscaloosa, AL 35487, USA

<sup>5</sup>Lead Contact

\*Correspondence: [petros.ligoxygakis@bioch.ox.ac.uk](mailto:petros.ligoxygakis@bioch.ox.ac.uk)  
<http://dx.doi.org/10.1016/j.celrep.2017.04.007>

## SUMMARY

During aging, innate immunity progresses to a chronically active state. However, what distinguishes those that “age well” from those developing age-related neurological conditions is unclear. We used *Drosophila* to explore the cost of immunity in the aging brain. We show that mutations in intracellular negative regulators of the IMD/NF- $\kappa$ B pathway predisposed flies to toxic levels of antimicrobial peptides, resulting in early locomotor defects, extensive neurodegeneration, and reduced lifespan. These phenotypes were rescued when immunity was suppressed in glia. In healthy flies, suppressing immunity in glial cells resulted in increased adipokinetic hormonal signaling with high nutrient levels in later life and an extension of active lifespan. Thus, when levels of IMD/NF- $\kappa$ B deviate from normal, two mechanisms are at play: lower levels derepress an immune-endocrine axis, which mobilizes nutrients, leading to lifespan extension, whereas higher levels increase antimicrobial peptides, causing neurodegeneration. Immunity in the fly brain is therefore a key lifespan determinant.

## INTRODUCTION

In the later stages of human life, there is a sustained increase in innate immune activity that has been associated with aging (Franceschi et al., 2007). This is in contrast to the induction of an immune response by infection and its rapid termination when the pathogen is cleared. This heightened age-associated pro-inflammatory activity has been termed “inflammageing” (Franceschi et al., 2007). It is thought to be partly balancing the exhaustion of T cell-mediated immunity caused by a decrease in the number of naive T cells produced by the thymus because of organism-wide cell senescence (Franceschi et al., 2007;

Deeks, 2011). Other causes include the accumulation of tissue damage during the removal of senescent cells in various tissues and a defective autophagy response (Salminen et al., 2012). One of the most important transcriptional signatures in inflammaging of both humans and mice is the activation of the pro-inflammatory nuclear factor  $\kappa$ B (NF- $\kappa$ B) pathway (de Magalhães et al., 2009; Zhang et al., 2013).

It has been hypothesized that, under certain conditions of heightened innate immunity, inflammaging may lead to age-associated brain neurodegeneration (Giunta et al., 2008). Although it is not known what predisposes individuals to disease, central to this immune-to-brain signaling are microglia. In the aging brain, the microglia have a primed phenotype as a consequence of changes in their local environment (Moreno et al., 2011). Nevertheless, whether the process involves the age-dependent activity of the NF- $\kappa$ B pathway is still an open question.

Taken together, the data mentioned above indicate the important influence of innate immunity on both healthy aging and age-related neurodegeneration. However, because cause and effect are so intricately linked (neurodegeneration itself causes inflammation), it is unclear how common themes in signaling may end up with such distinct phenotypes (healthy aging versus neurological disease). In this context, we used *Drosophila* to explore the potential influence of NF- $\kappa$ B-controlled immune signaling in predisposition to age-related neurological disease as well as healthy aging.

In *Drosophila*, systemic infection triggers two NF- $\kappa$ B signaling pathways; namely, Toll and immune deficiency (IMD). The latter pathway has extensive similarities with the tumor necrosis factor receptor 1 (TNFR1) signaling cascade (Kounatidis and Ligoxygakis 2012). Upon infection, activation of IMD is triggered when fragments of peptidoglycan released by Gram-negative bacteria or Gram-positive bacilli bind the transmembrane peptidoglycan recognition protein (PGRP)-LC or the intracellular PGRP-LE (Kaneko et al., 2006). The signal is then transduced through a receptor-adaptor complex to the NF- $\kappa$ B homolog Relish (Rel). Specifically, IMD (a RIP1 homolog) associates with the Fas-associated death domain protein (FADD), which then recruits

the caspase-8 homolog death related ced-3/Nedd2-like caspase (DREDD), which is activated by ubiquitylation (Meinander et al., 2012). DREDD cleaves IMD, thus unmasking a domain of interaction with the *Drosophila* inhibitor of apoptosis-2 (dIAP-2), which ubiquitinates and stabilizes IMD (Paquette et al., 2010). This creates a transient signaling platform for the recruitment of transforming growth factor  $\beta$  (TGF- $\beta$ )-activating kinase 1 (TAK1) and its binding adaptor TAB2 (Fernando et al., 2014). The TAK1/TAB2 complex mediates phosphorylation of the I $\kappa$ B kinase (IKK) on one hand and Jun nuclear kinase (JNK) on the other (Silverman et al., 2003). In turn, IKK phosphorylates the N-terminal domain of Rel, whereas DREDD cleaves the C-terminal. N-terminal Rel is then free to move to the nucleus and regulate transcriptional targets, including induction of antimicrobial peptide (AMP) genes (Stoven et al., 2003). As the signal is transmitted from the cell surface to the nucleus, there is negative regulation at every step. There is inhibition of PGRP-LC signaling by the transmembrane PGRP-LF (Basbous et al., 2011), inhibition of the receptor-adaptor complex through Rudra/Pirk (Aggarwal et al., 2008), and blocking of the signaling flow by successive de-ubiquitination enzymes targeting IMD (dUSP36) (Thevenon et al., 2009), TAK1 (the A20 homolog Trabid) (Fernando et al., 2014), or IKK (the cylindromatosis disease homolog cylindromatosis [CYLD]) (Tsichritzis et al., 2007). Moreover, ubiquitin-mediated proteolysis depletes the pathway from DREDD (via Dnr1) (Guntermann et al., 2009), TAK1 (via plenty of SH3 [POSH]) (Tsuda et al., 2005), and Relish (via ring and YY1 binding protein [dRYBP]) (Aparicio et al., 2013), whereas transglutaminase (TG)-catalyzed protein-protein cross-linking prevents Relish from entering the nucleus (Shibata et al., 2013). Finally, Caspar inhibits DREDD-dependent cleavage of Relish (Kim et al., 2006). In addition, there are extracellular negative regulators represented by secreted catalytic PGRP proteins (PGRP-LB and PGRP-SC), which reduce the epithelial and/or systemic response by scavenging peptidoglycan (Paredes et al., 2011). The safeguarding of the IMD pathway at all levels and with multiple means underlines the notion of an important cost paid if these safeguards were to decrease or collapse. Indeed, lack of Trabid, Pirk, PGRP-SC, or PGRP-LB compromise lifespan (Fernando et al., 2014; Paredes et al., 2011), whereas mutations in *dnr-1* or overexpression of AMPs in the brain result in neurodegeneration (Cao et al., 2013). Similarly, continuous overexpression of PGRP-LE, leading to chronic upregulation of AMPs, compromised lifespan in a Relish-dependent manner, linking immunity, inflammation, and longevity in flies (Libert et al., 2006). Moreover, TG has been associated with neurotoxicity in a spinocerebellar ataxia model (Lin et al., 2015), whereas mutations in *relish* suppress neurodegeneration in an ataxia-telangiectasia model (Petersen et al., 2013). Nevertheless, innate immune genes are upregulated in fly models of neurodegeneration, raising the possibility that this upregulation may be protective (Cantera and Barrio, 2015). In this context also, cause and consequence might be intimately linked.

In addition to the link between components of the immune system and neurodegeneration, there is an intimate connection between immunity and metabolism. In mammals, adipose tissues and infiltrating immune cells produce numerous bioactive factors that have pro-inflammatory or anti-inflammatory activities. Dysregulated production of so-called adipokines can contribute to the

pathogenesis of obesity-linked metabolic disease (for a review, see Ouchi et al., 2011). These players have been shown to drive type 2 diabetes, whereas cytokines regulate lipid stores (for a review, see Donath and Shoelson, 2011). In flies, prolonged immune activation in the context of bacterial or viral infections has also been associated with deregulation of metabolism, mainly through the insulin signaling pathway (Dionne et al., 2006; DiAngelo et al., 2009). More recently, a switch between immunity and metabolism has been identified in the transcription factor Mef2. There, sustained immune activity removed Mef2 from metabolic regulation, whereas, in the absence of infection, Mef2 associated primarily with metabolic transcriptional signatures (Clark et al., 2013).

The results presented here show that, with age, NF- $\kappa$ B-dependent AMP gene expression increased, and this was accompanied by progressive neurodegeneration and locomotion decline. Constitutive NF- $\kappa$ B immune signaling (in *pirk*, *trbd*, or *tg* mutants) resulted in high head and brain AMPs. Flies had a short lifespan, severe neurodegeneration, and locomotor defects. Conversely, reducing the normal levels of NF- $\kappa$ B in the brain of healthy flies resulted in an extended lifespan with improved activity in old age, accompanied by increased hormonal signaling and elevated glucose, trehalose, and triglycerides. Our results demonstrate that IMD/NF- $\kappa$ B/Relish immune signaling in glia determines lifespan.

## RESULTS

### Age-Dependent Immune Regulation in Flies

We monitored the age-related expression of negative regulators of IMD, Toll, and JNK by comparing healthy whole flies, heads, and the rest of the body in the absence of infection. Our results indicated a consistent pattern: age-dependent gene expression of IMD *intracellular* negative regulators was significantly reduced in heads (Figure 1A) compared with the rest of the body (where expression of some was increased, compare Figure S1A with Figure 1A) or to whole flies (where expression appeared unchanged, compare Figure S1B with Figure 1A). In contrast, expression of IMD *extracellular* negative regulators was increased with age in heads (Figure 1A), the rest of the body (Figure S1A), and whole flies (Figure S1B). The decrease of intracellular negative regulation in the heads of aging flies was paralleled by a dramatic increase in AMP gene expression in the heads of 30- and 50-day-old flies (compare Figure 1B with Figures S1C and S1D for the rest of the body and whole flies respectively; see Figure 1C for a combined graph for a 30-day-old dataset; see Figure S1E for a 50 day-old dataset). We also observed a statistically significant increase in expression levels of *rel* in heads and whole bodies of 30-day-old flies compared with young 5-day-old controls (Figure S1F). *Dif* expression was also increased in the heads of 30-day-old flies (Figure S1F). However, this increase was not to the same extent as *rel* (3.2-fold versus 1.9-fold induction for *rel* and *dif*, respectively; Figure S1F). No significant change in expression of other components of the Toll or JNK pathway was observed with age (Figure S1F).

Comparison of AMP gene expression levels in the heads of conventionally reared versus germ-free flies indicated the importance of the microbial environment in the age-dependent increase observed (compare Figure 1D with Figure 1C). The

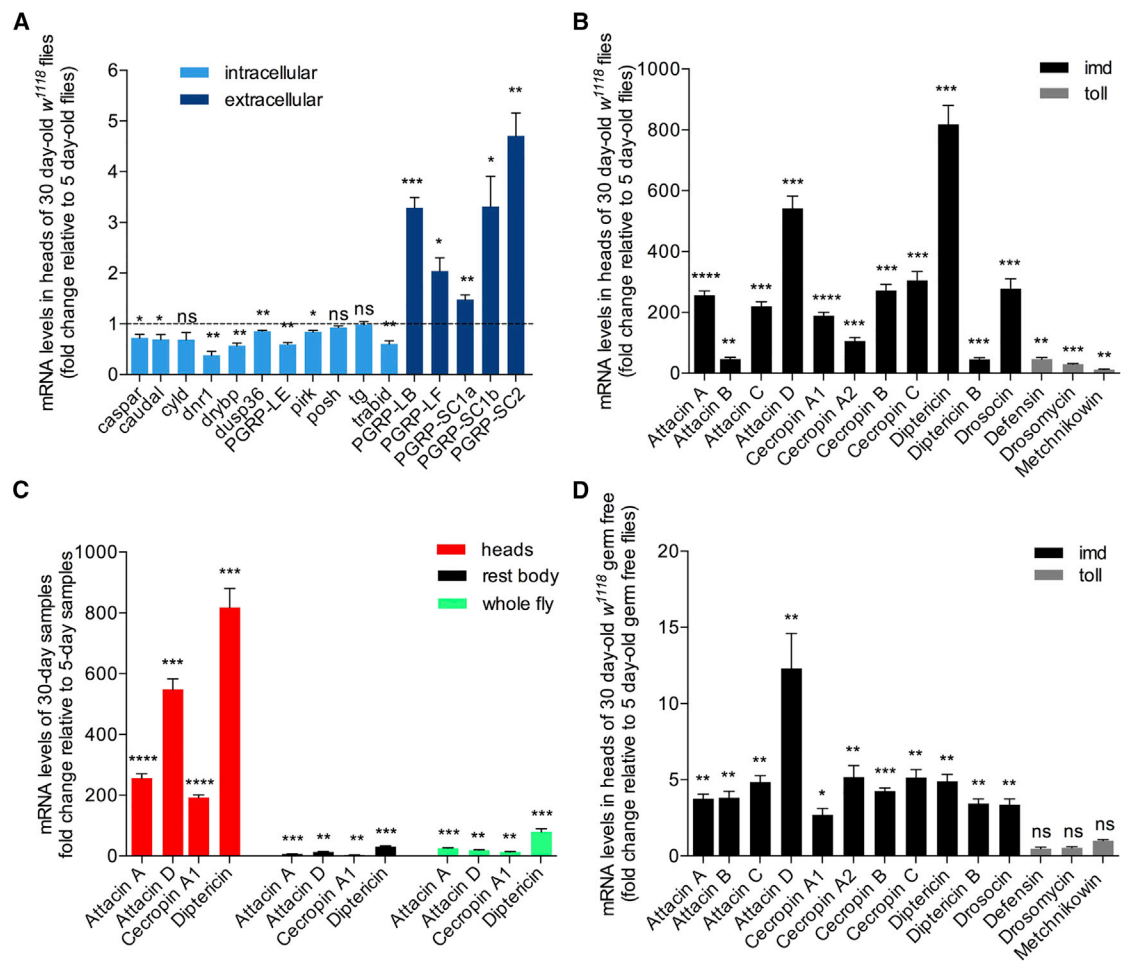

**Figure 1. Healthy Aging in *Drosophila* Is Characterized by Age-Dependent Upregulation of Immunity**

(A–D) In the heads of 30-day old flies, gene expression of intracellular negative regulators of IMD was reduced, whereas gene expression of extracellular negative regulators was increased (A). This pattern was accompanied by a significant increase in AMP gene expression in the head (B), the rest of the body, and whole flies (C, comparative graph). IMD-dependent (but not TOLL-dependent) AMP gene expression was also increased with age in the heads of 30-day-old germ-free flies (D). Values shown are mean  $\pm$  SEM.

largest part of this increase (>90%) was microbiota-dependent (Figures S1G and S1H). Nevertheless, this still indicated that there was a microbially independent, intrinsic propensity for age-dependent deregulation of the IMD pathway (Figures S1G and S1H). (Of note, that measurements under axenic conditions showed that the AMP gene expression increase concerned only IMD-regulated AMPs and not TOLL-dependent ones; Figure 1D).

We also observed an age-dependent increase in GFP expression in the brains of flies carrying a reporter gene in which GFP expression was under the control of the *attacinA* promoter (Tzou et al., 2000) (*Attacin-GFP*; Figure 2A). In addition, measurements by qPCR revealed an increase in AMP expression in brains of 30-day-old flies compared with their 5-day-old counterparts (Figure 2B). The results from these experiments indicated that the age-dependent increase in IMD-related AMP gene expression was concerning the brain itself and not just the surrounding tissues.

This age-dependent shift in IMD-related AMP transcription was the result of a specific pattern: a combined decrease in some

negative *intracellular* regulators and an increase in *extracellular* negative regulators with a sum total culminating in an increase in *rel* mRNA levels and a rise in AMPs controlled by Rel. Furthermore, the age-dependent increase of AMPs was accompanied by an increase in brain neurodegeneration (see Figure 2C for sections, Figure 2D for index, and Table S1 for statistics) and locomotion defects (see Figure 2E and Table S2 for statistics) in 50-day-old flies. Taken together, the data above indicated a phenotype where an age-related increase in IMD/NF- $\kappa$ B-driven immunity was combined with a neurological decline. Whether this was a cause-and-effect relationship was our next question.

### Loss of NF- $\kappa$ B Intracellular Negative Regulation Predisposes to Early Neurodegeneration and Short Lifespan

We reasoned that one way to explore this question would be to manipulate IMD/NF- $\kappa$ B signaling and measure any changes

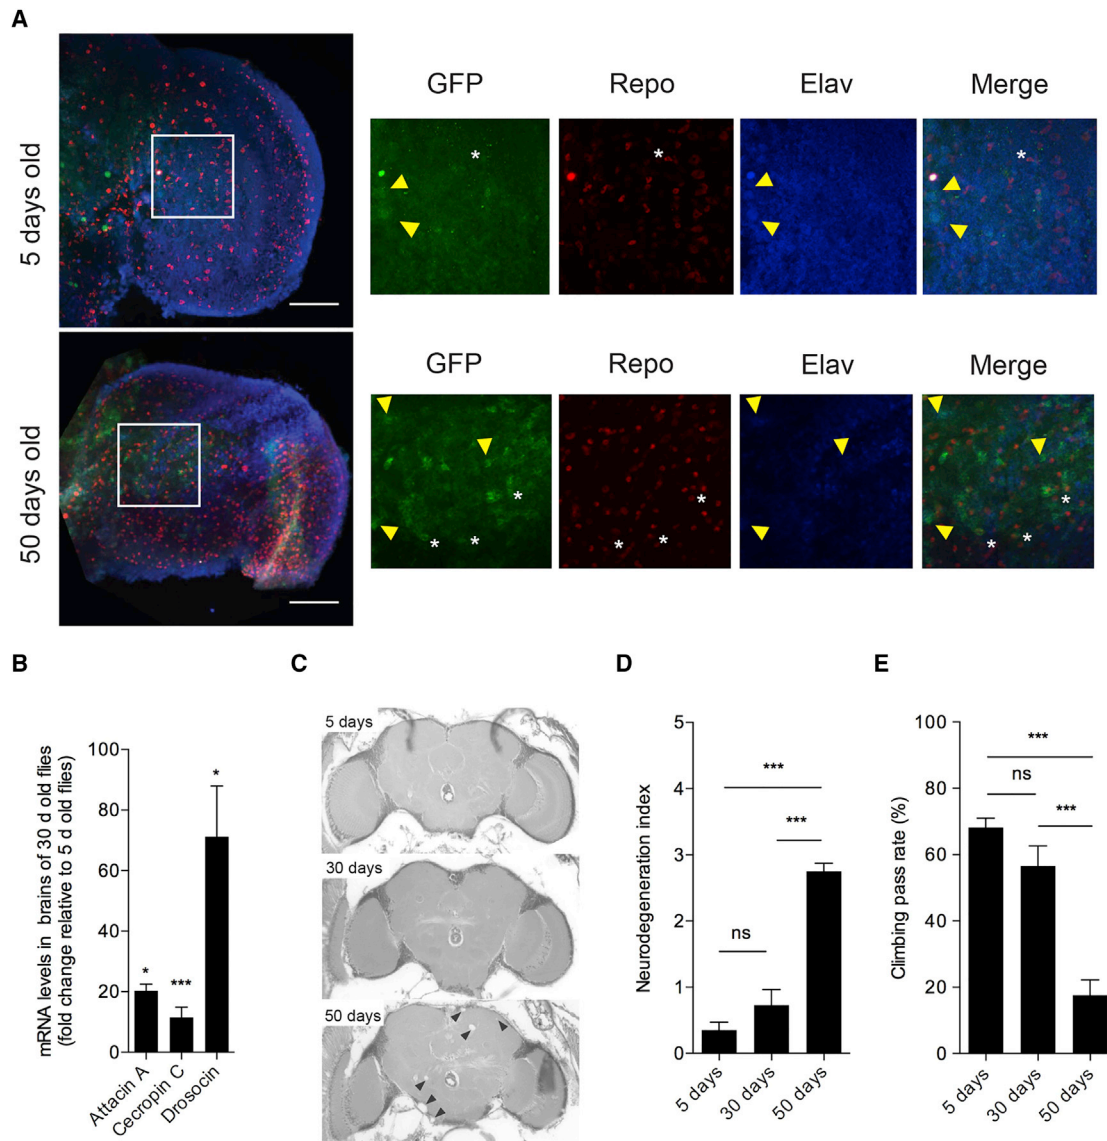

### Figure 2. Increase of AMP Levels in the Brain Correlates with Neurological Decline

(A) Confocal stacks of 5- and 50-day-old (top and bottom panels, respectively) *Attacin-GFP* optic lobes of brains immunostained for GFP (green), the glial marker Repo (red), and the neuronal marker Elav (blue). All three markers are shown in the merged image. An increase in GFP staining is observed in the brains of older flies, where GFP co-localizes with both Repo (asterisks) and Elav (arrowheads). The boxed regions show an enlarged image of the optic lobes. Representative images are shown.  $n = 19$  (5 days old) and  $n = 12$  (50 days old). Scale bars, 50  $\mu\text{m}$ .

(B–E) Significant age-dependent upregulation of AMPs in brains was also observed by qPCR (B). This increase was accompanied by neurodegeneration (arrowheads) in 50-day-old flies as observed (C) and quantified (D) in midbrain sections. This was coupled to a reduction in locomotor activity in 50-day-old flies (E). In all experiments, the fly strain used was  $w^{1118}$ . Values shown are mean  $\pm$  SEM. Asterisks denote statistically significant differences ( $*p \leq 0.05$ ,  $***p \leq 0.001$ , ns, non-significant).

in the age-dependent neurological state of our flies. The causative relationship between increased IMD/NF- $\kappa\text{B}$  signaling levels and age-dependent neurological deterioration was identified previously for loss of Dnr1 (Cao et al., 2013). Therefore, we asked whether disabling other negative regulators and, thus, increasing IMD/NF- $\kappa\text{B}$  signaling levels could predispose flies to early onset of neurological decline, brain neurodegeneration, and, finally, reduced lifespan. Brain sections

of 5- and 20- or 30-day-old loss-of-function mutants of the intracellular negative regulators (regardless whether their age-dependent expression declined or stayed the same) *posh*, *cyld*, and *caspar* (with their  $w^{1118}$  genetic background as a control) and *tg*, *trbd*, *pirk*, and *drybp* (with their *yw* genetic background as a control) as well as of the extracellular negative regulator *pgrp-lb* (with its  $w^{1118}$  genetic background as a control) were examined at both 25°C (see

Figures 3A and 3B for brain sections and Figures 3C and 3D and Table S1 for index) and 29°C (accelerated aging; see Figures S2A, S2B, and S2E for brain sections, Figures S2C, S2D, and S2F for index, and Table S1 for statistical analysis). Early studies examining *Drosophila* lifespan at different temperatures have established a positive relationship between mortality and increase in temperature, therefore suggesting that flies are living and aging faster at 29°C than at 25°C (Alpatov and Pearl, 1929; Miquel et al., 1976). At both temperatures, our results revealed a statistically significant increase in the neurodegeneration index for three mutants in intracellular regulators of the IMD pathway; namely, *tg*, *trbd*, and *pirk*. In addition, plotting the neurodegeneration index against *lmd* transcriptional output (measured by gene expression levels of the AMP *diptericin*) indicated that the *dipt* levels in these three mutants correlated with the highest index (Figure 3E).

Of note, we found that the neurodegeneration index for conventionally reared mutants of PGRP-LB was comparable with the wild-type. This indicated that, despite the reduction in lifespan reported in the literature (Paredes et al., 2011), neurodegeneration was not the cause of early death in this mutant. Moreover, in contrast to *trbd* and *tg* (see below), under germ-free conditions, the lifespan of flies lacking PGRP-LB was restored to normal (Paredes et al., 2011 and data not shown). This result confirmed previous studies that indicated that the reduction in lifespan in PGRP-LB mutants was due to commensal dysbiosis (Paredes et al., 2011).

Along with the age-dependent neurodegeneration in *tg*, *trbd*, and *pirk*, these mutants showed a statistically significant increase in AMP gene expression in heads (Figure 4A), dissected brains (Figure 4B), and the rest of the body (Figure S3A) compared with the control. They were therefore exposed to “increased immune signaling from a young age” (predisposition) and were studied further. *Tg*, *trbd*, and *pirk* mutant flies exhibited an early reduction in locomotor activity (see Figure 4C and Table S2 for statistics) and showed a 24.2%, 37.1%, and 9.1% reduction in maximum lifespan, respectively, compared with wild-type controls (see Figure 4D and Table S3 for statistics). In the case of *trbd* and *tg*, lifespan patterns were not influenced by the absence of bacterial populations because they exhibited a statistically non-distinguishable reduction in lifespan under germ-free conditions (Figure 4D; Table S3). However, the reduction in lifespan of *pirk* mutants was rescued in germ-free flies (Figure 4D; Table S3), as has been reported elsewhere (Paredes et al., 2011). This result was in accordance with the published observation that *pirk* expression was regulated by the presence of the gut microflora (Lhocine et al., 2008) and underscored the differences between microbe-independent and microbe-dependent intracellular negative regulation of the IMD pathway (see Discussion).

In contrast to *pirk*, *trbd*, and *tg*, negative regulator mutants that did not show age-dependent neurodegeneration, such as *drybp* (Figure 3A) and *caspar* (Figure 3B), had levels of AMPs in their brains similar to controls (Figure S3B) and a lifespan that was not reduced compared with controls (the lifespan for *caspar* was actually increased; see Figure S3C and Table S3 for statistics). These results indicated that loss of different intracellular negative regulators had different effects on brain-specific AMP expression and, as a consequence, different effects on brain tissue, locomotion,

and, ultimately, lifespan. This result also suggested possible tissue specificity (see Discussion). These differences notwithstanding, our results indicated that an increase in AMP gene expression did correlate with an increase in neurological decline and reduced lifespan. Indeed, Cao et al. (2013) have shown that overexpression of single AMPs increased neurodegeneration. We explored further the underlying neurological and lifespan phenotype and found that individual overexpression of *drosocin*, *attacinC*, or *cecropinA1* in neurons resulted in reduced lifespan and age-dependent climbing ability (Figures S3D and S3E, respectively). Similarly, overexpression of *drosocin*, *attacinC*, or *cecropinA1* in glia resulted in reduced lifespan and age-dependent climbing ability (Figures S3F and S3G, respectively).

### Silencing NF- $\kappa$ B in the Brain of Predisposed Flies Restores Lifespan and Suppresses Neurodegeneration

In *trbd* mutants, the median lifespan (LT<sub>50</sub>) was 29 days (Figure 5A; statistics in Table S3; see also Fernando et al., 2014). This phenotype was suppressed when *rel* was silenced in neurons (*w<sup>1118</sup>; elav-GAL4/UAS-Rel<sup>RNAi</sup>; trbd*, LT<sub>50</sub> = 42) and even more when *rel* was suppressed in glia (*w<sup>1118</sup>; repo-GAL4/UAS-Rel<sup>RNAi</sup>; trbd*), with an LT<sub>50</sub> of 48 days that was in line with the LT<sub>50</sub> (52 days) of its genetic background (Figure 6A; Table S3). Mating rates were statistically indistinguishable in all different RNAi interventions compared with controls and *trbd* mutants (Table S6). Finally, the lifespan of *trbd* flies with only either of the GAL4 drivers or just the *UAS-Rel<sup>RNAi</sup>* transgene was statistically indistinguishable from *trbd* alone (data not shown).

Compared with 5-day-old and 30-day-old controls, *rel*-silenced flies exhibited reduced AMPs in heads (Figure 5B). Neurodegeneration was reduced, and locomotor activity increased when *rel* was silenced in glia (see Figure 5C for brain sections, Figure 5D and Table S1 for index, and Figure S4A and Table S2 for locomotor assays), but not when it was silenced in neurons (see Figure S4B for brain sections, Figure S4C and Table S1 for index, and Figure S4D and Table S2 for locomotor assays). This result underlined the role of glia in the immunity-to-brain axis whereby suppressing immunity in glia rescued both neurodegeneration and locomotion and, thus, restored lifespan to wild-type levels. The data also supported the notion that predisposition to early neurodegeneration was determined by IMD/NF- $\kappa$ B pathway levels.

### Suppressing NF- $\kappa$ B Immune Signaling in Healthy Flies Extends Lifespan

If increased levels of IMD/NF- $\kappa$ B signaling led to the reduction of lifespan with early onset of age-related neurological decline, we wanted to test whether a decrease in normal IMD signaling levels in healthy flies from the beginning of their life could have the opposite effect. To this end, we initially assayed the effects on lifespan of two IMD-null mutants (*yw; dredd<sup>B118</sup>* and *w<sup>1118</sup>; rel<sup>E20</sup>*), one hypomorphic mutant (*w<sup>1118</sup>; dredd<sup>EP1412</sup>*), and their genetic backgrounds to which the mutant strains were backcrossed for ten generations as recommended (He and Jasper, 2014). *Dredd-* or *rel-*null flies had a statistically significant reduction in lifespan compared with their genetic backgrounds (Figure 6A; Table S3). However, the hypomorphic *w<sup>1118</sup>; dredd<sup>EP1412</sup>*, although it showed the same significant reduction in LT<sub>50</sub> as the null IMD pathway mutants compared

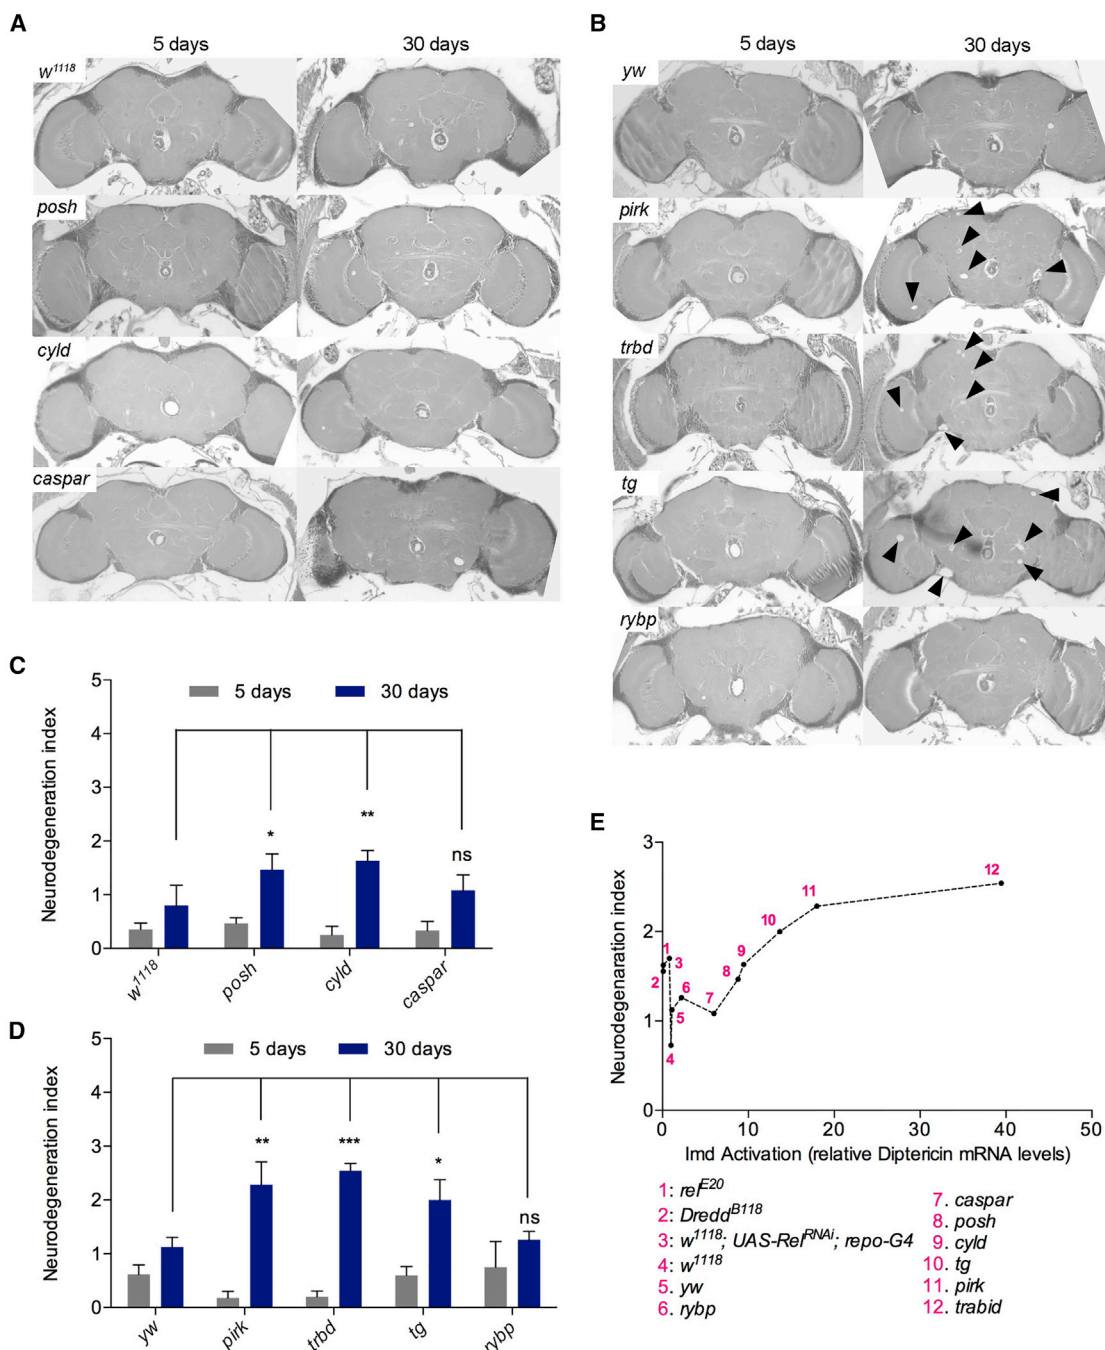

**Figure 3. Loss of Intracellular Negative Regulators of NF- $\kappa$ B/Relish Triggers Early Onset of Neurodegeneration**

5- and 30-day-old mutants for intracellular negative regulators of the IMD pathway, aged at 25°C, were examined for age-dependent neurodegeneration by histology and then quantified.

(A) Midbrain sections of *caspar* mutant flies did not show any differences compared with their genetic background (age-matched *w<sup>1118</sup>* controls). However, some sections showed an increase in *cyld* and *posh* mutants (data not shown).

(B) Mutants for the intracellular negative regulators *pirk*, *trbd*, and *tg*, but not *rybp*, showed increased age-dependent neurodegeneration in midbrain sections.

(C) When quantified, *caspar* mutant flies had a neurodegeneration index indistinguishable to *w<sup>1118</sup>* controls, whereas *posh* and *cyld* had a significant increase in neurodegeneration.

(D) Quantification of *pirk*, *trbd*, and *tg*, but not *rybp*, revealed a neurodegeneration index that was significantly different from *yw* controls.

(E) Neurodegeneration index in correlation with Imd pathway output (as measured by *dip1* gene expression). The increase in neurodegeneration correlated with an increase in mRNA levels of *dip1*.

Values shown are mean  $\pm$  SEM. Asterisks denote statistically significant differences (\* $p \leq 0.05$ , \*\* $p \leq 0.01$ , \*\*\* $p \leq 0.001$ ).

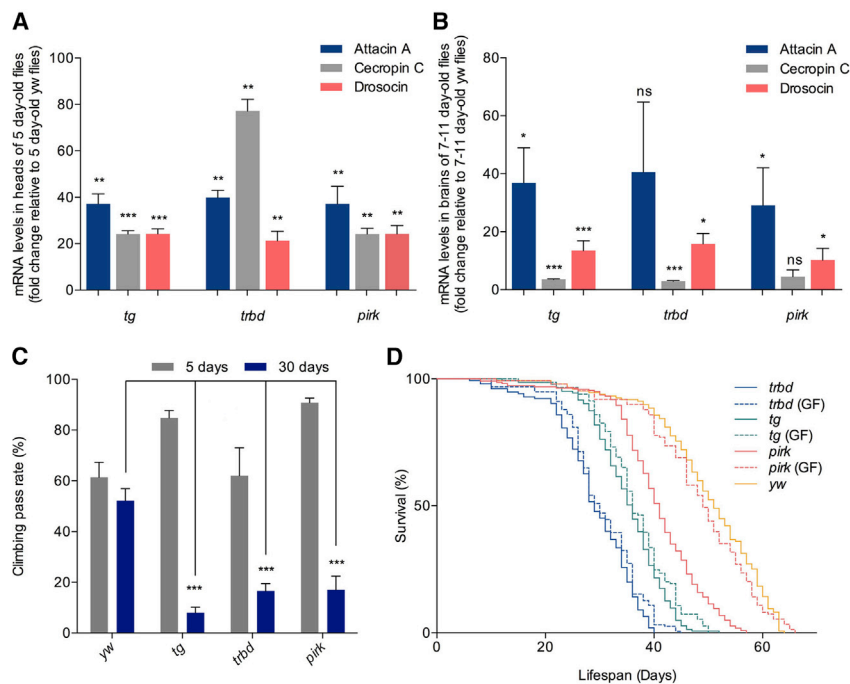

**Figure 4. Loss of Intracellular Negative Regulators of NF-κB/Relish Leads to a Brain-Specific Increase in Expression of AMPs, Locomotor Defects, and Shorter Lifespan**

(A–D) A significant increase in AMP gene expression in comparison with *yw* controls was observed in heads (A) and dissected brains (B) of *pirk*, *trbd*, and *tg* mutants that correlated with a decrease in locomotor activity (C). The shorter lifespan of *pirk*, but not *trbd* or *tg* mutants, was rescued under germ-free (GF) conditions (D). Values shown are mean  $\pm$  SEM. Asterisks denote statistically significant differences (\* $p \leq 0.05$ , \*\* $p \leq 0.01$ , \*\*\* $p \leq 0.001$ ).

*UAS-Rel<sup>RNAi</sup>*, as recently documented (Guo et al., 2014). In *w<sup>1118</sup>; np1-GAL4; UAS-Rel<sup>RNAi</sup>* flies, the LT<sub>50</sub> was 61 days and the maximum lifespan 70 days. However, *w<sup>1118</sup>; np1-GAL4* alone had a slightly increased LT<sub>50</sub> compared with *w<sup>1118</sup>*, which was not the case for *w<sup>1118</sup>; elav-GAL4* or *w<sup>1118</sup>; repo-GAL4* (Figure 6D; Table S3). Interestingly, flies with glia- or neuron-specific suppression of immunity signaling did not show a reduction in brain

with controls, also displayed a statistically significant increase in less than 90% (LT<sub>90</sub>) and maximum lifespan (Figure 6A; Table S3). However, no difference was observed in neurodegeneration in both brain sections (Figure 6B; Table S1) and index (Figure 6C; Table S4).

Nevertheless, this result suggested the possibility that a lower (but not null) IMD pathway activity could increase the maximum lifespan in some flies by reducing the cost of the age-dependent increase in levels of immune activity. To test this idea, we used the galactose responsive transcription factor 4/upstream activation sequence (GAL4/UAS) system to suppress *rel* via RNAi in either neurons (*elav-GAL4*) or glia (*repo-GAL4*) or the intestine (*np1-GAL4*). The latter GAL4 driver was used because the gut has been suggested to be the tissue where upregulation of *rel* causes age-related commensal dysbiosis (Guo et al., 2014). Previous studies have demonstrated that induction of the RNAi mechanism itself in the nervous system or gut does not influence adult lifespan (Alic et al., 2012). In addition, the mating rates were statistically indistinguishable in all different RNAi interventions compared with controls (Table S6).

Our results indicated a significant extension of lifespan when *rel* was suppressed in either neurons or glia (Figure 6D). In our hands (see Experimental Procedures), the genetic background *w<sup>1118</sup>* had an LT<sub>50</sub> of 52 days and an LT<sub>90</sub> of 62 days, with a maximum lifespan of 65 days (see Figure 6D for a graph and Table S3 for statistics). In comparison, the *w<sup>1118</sup>; elav-GAL4; UAS-Rel<sup>RNAi</sup>* LT<sub>50</sub> was 67 days (an increase of 29%) and an LT<sub>90</sub> of 79 days with a maximum lifespan of 88 days (35% increase). For *w<sup>1118</sup>; repo-GAL4; UAS-Rel<sup>RNAi</sup>*, the LT<sub>50</sub> was 84 days (an increase of 61%), the LT<sub>90</sub> was 95 days, and the maximum lifespan was 106 days (an increase of 63%; Figure 6D and Table S3). We also observed a comparatively modest (but statistically significant) increase in lifespan in *w<sup>1118</sup>; np1-GAL4;*

neurodegeneration levels compared with controls (see Figure S5A for brain sections, Figure S5B for glia index, and Figure S5C for neuron index) even though AMPs in the heads were significantly reduced as expected (Figure S5D). This indicated that a reduction in the basal level of neurodegeneration was not the reason for lifespan extension. Nevertheless, glia-specific (but not neuron-specific) suppression resulted in increased locomotion in older flies (Figure 6E). This indicated that the lifespan extension in *w<sup>1118</sup>; repo-GAL4; UAS-Rel<sup>RNAi</sup>* flies was not just an extension of the moribund phase but corresponded to more activity in old age. An extension of lifespan statistically comparable with *w<sup>1118</sup>; repo-GAL4; UAS-Rel<sup>RNAi</sup>* flies was also observed in *w<sup>1118</sup>; repo-GAL4; UAS-dredd<sup>RNAi</sup>* flies and *w<sup>1118</sup>; repo-GAL4; UAS-imd<sup>RNAi</sup>* flies, two IMD pathway components upstream of Relish (see Figure 6F and Table S3 for statistics). To verify whether mating had an effect, we reproduced the same result in mated females only (see Figure S5E and Table S6 for statistics). Crucially, this extension was also correlated with a greater locomotor activity in later life (see Figure 6G and Table S5 for statistics). These results reinforced the notion that IMD/NF-κB signaling in the brain was linked to life expectancy in flies.

### An Immune-Neuroendocrine Axis Mediates Lifespan Extension in Flies

The observed increase in physical performance in old age in flies with suppressed *Imd* signaling in glial cells was accompanied by doubling of the transcriptional levels of the adipokinetic hormone (Akh) hormone (Figure 7A). In contrast, this was not the case for mutants of negative regulators (*trbd*, *tg*, and *pirk*), where the pathway was constitutively active (Figure S6A).

Akh, which has glucagon-like functions, has been shown to increase the levels of blood glucose (Kim and Rulifson, 2004)



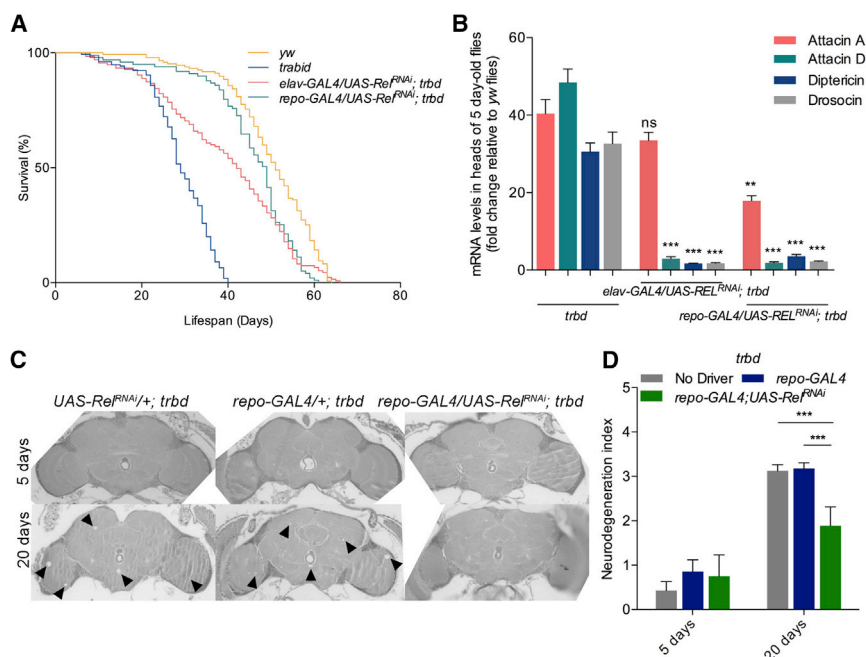

**Figure 5. Predisposition to Neurodegeneration Is Suppressed by Reducing NF-κB/Relish in the Brain**

(A and B) In *trbd* mutants, reduction of lifespan (A) and upregulation of AMPs (B) were suppressed by silencing *rel* in neurons (*elav-GAL4*) or glia (*repo-GAL4*).

(C and D) Neurodegeneration in brain sections (C) and quantification (D) showed that lifespan extension was accompanied by fully rescued neurodegeneration only when *rel* was silenced in glia (compare with Figure S4B for sections when *rel* was silenced in neurons).

Values shown are mean ± SEM. Asterisks denote statistically significant differences (\*\**p* ≤ 0.01, \*\*\**p* ≤ 0.001).

## DISCUSSION

### Loss of IMD Homeostasis Predispose to Age-Dependent Neurodegeneration

We have shown that, in *Drosophila*, an age-related pattern of increased NF-κB-controlled immune activity is caused by

as well as to extend lifespan and modulate climbing activity in *Drosophila* (Waterson et al., 2014). It has also been shown to sustain flight in locusts, tobacco hornworm moths, and certain beetles (reviewed in Gäde and Auerswald, 2003). In addition, its homolog in mice decelerates aging (Zhang et al., 2013). Consistent with the above, injections of a locust Akh in 30-day-old (see Figure 7B for a 5-cm climb in 10 s) and 50-day-old wild-type *Drosophila* increased locomotion (see Figure 7C for a 5-cm climb in 10 s and Figure 7D for a 2.5-cm climb in 10 s).

To corroborate the role of AKH as the effector of lifespan extension, we measured metabolic markers that have been associated with AKH signaling in *Drosophila* (Lee and Park, 2004; Bharucha et al., 2008). 30-day-old *w<sup>1118</sup>; repo-GAL4; UAS-Rel<sup>RNAi</sup>* flies showed a statistically significant increase in glucose levels (free glucose levels in whole flies; Figure 7B) as well as in circulating trehalose (representing glucose dimers; Figure 7C). Of note is that levels of glycogen, which represented stored glucose, were unchanged relative to controls (Figure S6E). Consistent with the action of AKH signaling on mobilization of lipid stores, triglycerides (TAGs) as well as total dry mass (but not total weight) were increased in long-lived flies (Figure 7E). In contrast, total protein levels were indistinguishable from *w<sup>1118</sup>* controls and *w<sup>1118</sup>; repo-GAL4* flies (Figure S6F). Finally, the metabolic changes observed were not due to calorie restriction because the feeding rates between long-lived and control flies were statistically indistinguishable (Figure 7F). Taken together, the above results indicated that, during healthy aging, suppression of NF-κB activity delayed neurological decline through a mechanism involving an immune-endocrine axis that seems to be evolutionary conserved in mice (Zhang et al., 2013).

a parallel reduction in intracellular negative regulation. As seen in germ-free flies, this age-dependent rise in immune levels was observed downstream of IMD but not TOLL. Moreover, axenic conditions revealed that this increase was, to a large extent, due to the microbial environment. However, the trend of this increase (albeit at a reduced scale) remained in germ-free flies, indicating a mechanism independent of the microbiota.

This phenomenon was also accompanied by neurological and locomotor decline, but it was unclear whether this was a consequence of increased immune activation. If this were the case, we hypothesized that loss-of-function mutations in intracellular negative regulators of IMD would predispose flies to high AMP levels and, thus, to immune-dependent early neurodegeneration. Indeed, overexpression of AMPs with *repo-* or *elav-GAL4* can cause lesions in the brain at 25 days of age (Cao et al., 2013). Moreover, overexpression of the AMPs *drosocin*, *attacinC*, and *cecropinA1* in neurons or glia was accompanied by a reduction in lifespan and early appearance of locomotor defects in comparison with controls. Taken together, these results indicate a causative relationship between high levels of AMPs and neurodegeneration. Indeed, plotting the neurodegeneration index against the levels of the AMP gene *diptericin* in various mutant and control genetic backgrounds showed that increased neurodegeneration correlated with increased *dipt* levels (Figure 3E).

Nevertheless, Petersen et al. (2013) have suggested that it shows correlation, not causation, because *imd* alleles still show neurodegeneration. This view correlates with our results showing that both loss of function of IMD signaling components as well as silencing by RNAi in the brain of these same components did not reduce basal neurodegeneration. Therefore, the basal levels of neurodegeneration in healthy aging are primarily NF-κB-independent. Alternatively, the histological method we

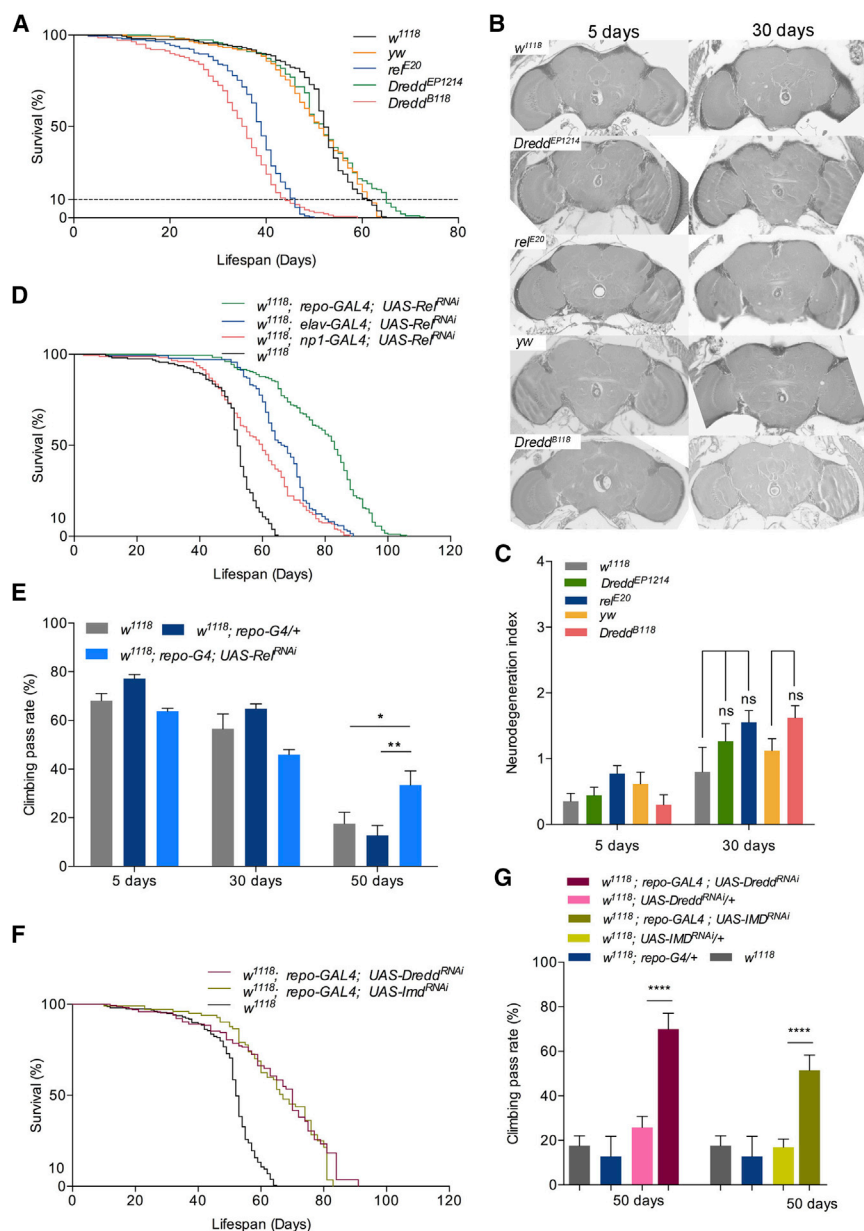

**Figure 6. Glial Suppression of IMD/NF-κB Signaling in Healthy Flies Extends Active Lifespan**

(A–C) The maximum lifespan of a hypomorphic allele of *Dredd* (*Dredd<sup>EP1214</sup>*) showed a modest extension compared with *w<sup>1118</sup>* controls. Nevertheless, midbrain sections (B) and quantification (C) of *yw*; *dredd<sup>B118</sup>*, *w<sup>1118</sup>*, *rel<sup>F20</sup>*-null mutants and a *w<sup>1118</sup>*; *dredd<sup>EP1412</sup>* hypomorphic mutant showed no difference in neurodegeneration compared with controls.

(D–G) RNAi-dependent silencing of *rel* in glia resulted in a very substantial extension of lifespan (D) and amelioration of the age-dependent decline in locomotor activity (E). Similarly, glial knockdown of *Dredd* and *Imd* resulted in lifespan extension (F) and amelioration of the age-dependent decline in locomotor activity (G).

Values shown are mean ± SEM. Asterisks denote statistically significant differences (\**p* ≤ 0.05, \*\**p* ≤ 0.01, \*\*\*\**p* ≤ 0.0001).

steps. Therefore, the question arises of why loss of these particular four intracellular negative regulators produced age-dependent neurodegeneration.

Our view is that the data underscore the context and/or tissue-dependent nature of IMD signaling and the difference between intracellular control exerted when interacting with the gut microbiota and/or upon infection (*dusp36*, *pgrp-le*, *pirk*, and *drybp*) (see Thevenon et al., 2009; Bosco-Drayon et al., 2012; Lhocine et al., 2008; and Aparicio et al., 2013; respectively) versus infection-independent homeostatic control (*dnr-1*, *trbd*, and *tg*) (see Cao et al., 2013; Fernando et al., 2014; and Shibata et al., 2013; respectively). For example, *Pirk* is the upstream-most flora-dependent intracellular negative regulator that is a target of the pathway, and, therefore, its loss will result in the absence of an important negative feedback loop (Lhocine et al., 2008).

have used may not be sensitive enough to detect any potential small changes. Nevertheless, downregulation of NF-κB extends the active lifespan despite levels of neurodegeneration remaining constant. This shows that, when IMD is under normal regulatory conditions, longevity is determined by control of metabolism rather than neurodegeneration (see below). Conversely, when IMD control is lost, and AMPs increase to toxic levels, causing early neurodegeneration (Cao et al., 2013; this study), NF-κB activity is the dominant lifespan determinant over and above any metabolic process.

Loss of four intracellular IMD negative regulators, *Trbd*, *Pirk*, *Tg* (this study), and *Dnr-1* (Cao et al., 2013), resulted in early neurodegeneration in combination with a reduction in lifespan. Nevertheless, the IMD pathway is negatively regulated at most

Nevertheless, this feedback loop is not important for lifespan in the absence of the gut microflora (Paredes et al., 2011). In contrast, flies reared under germ-free conditions reveal that intracellular regulators such as *Trbd* are important for IMD pathway homeostasis independent of the microbial environment (Fernando et al., 2014). A non-canonical or tissue-specific IMD pathway may also be at play in the brain, as has been suggested for the fly retina (Chinchore et al., 2012) or in an ataxia telangiectasia model (Petersen et al., 2013).

Loss of negative regulation in IMD signaling in the brain led to tissue disruption and early neurodegeneration. This phenotype was accompanied by a severe reduction in lifespan and locomotor defects. However, when *Relish* was silenced in glia of *trbd* mutants, brain lesions, lifespan, and locomotion were restored

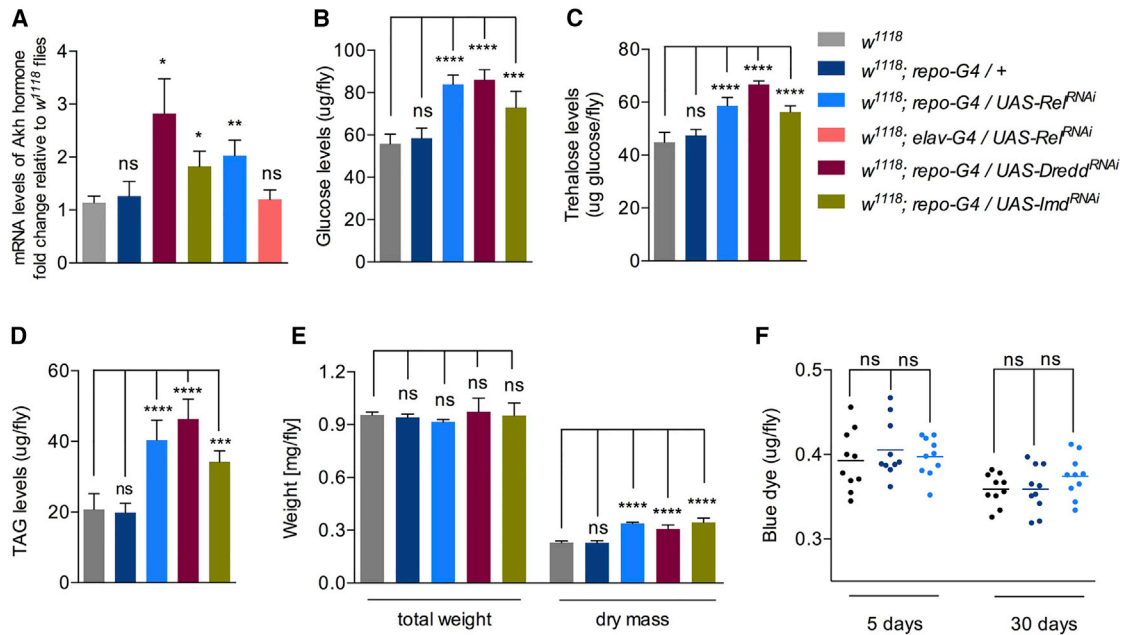

**Figure 7. Lifespan Extension following Glial Suppression of IMD/NF-κB Signaling Is Accompanied by Metabolic Changes**

(A) The RNAi-dependent silencing of *rel*, *dredd*, and *imd* resulted in an increase in *Akh* transcription.

(B–F) Increased AKH signaling triggered rises in (B) glucose, (C) trehalose, and (D) TAG levels that built up an increase in dry mass (E). Nevertheless, feeding rates were comparable with controls when *rel* was silenced in glia (F).

Values shown are mean ± SEM.

and comparable with healthy control flies. This showed that all effects were due to the derepression of NF-κB signaling.

Our results indicate that reduction of lifespan in *tg* and *trbd* is microbe-independent. We suggest that the main reason for this lifespan reduction is the microbiota-independent part of the early increase in AMPs in those mutants. Interestingly however, the lifespan reduction in *pirk* mutant flies was rescued under germ-free conditions. Because *pirk* mutants display early neurodegeneration, this raises the possibility of a gut-brain axis that may include a microflora-dependent component, which, in turn, influences brain neurodegeneration. Indeed, it has been shown previously that, as flies age, their gut becomes leaky, resulting in aging decline with a strong microbiota-driven component (Rera et al., 2012). More work is needed to understand this interaction.

Finally, our work indicates that the age-dependent regulation of the *Imd* pathway is at a state of allostasis (when homeostasis is achieved through change). Taken at specific time points, signaling output is defined by the microbial environment, and, in the absence of infection, it is tightly regulated to a basal level. However, this basal level increases in an age-dependent manner. By culturing germ-free *Drosophila*, we were able to pinpoint the component of this signaling that is microbe-independent and intrinsic to the host.

### Suppression of IMD Extends Lifespan

Lowering the levels of IMD signaling by RNAi in glia of healthy flies extended the lifespan by more than 60% in  $LT_{50}$  and increased physical activity in old age. Our results agree with a previous observation that pharmacological inhibition of NF-κB

modestly extends the *Drosophila* lifespan (20% of  $LT_{50}$ ; Moskalev and Shaposhnikov, 2011). However, we go further to indicate mechanism and tissue specificity. Lifespan extension was not achieved by lower levels of neurodegeneration but by an increase in AKH signaling. This indicated that the basal level of neurodegeneration in healthy flies was independent of IMD/NF-κB.

Extension of lifespan was accompanied by an altered metabolic profile, including statistically significant increases in free glucose, trehalose, and TAGs, whereas there was no significant difference in glycogen and protein levels. This suggested a shift toward catabolism, leading to the immediate use of carbohydrates and fats (as opposed to storing them) to fulfill the energetic requirements of long-lived flies. Increases in glucose, trehalose, and TAGs were consistent with the upregulation of *akh* expression and confirmed IMD signaling as a potent modulator of lifespan upstream of AKH.

More work is needed to identify the NF-κB targets in glia that enable AKH activation and establishment of this immune-neuroendocrine axis. We speculate that this is not a direct transcriptional relationship because *akh cis*-regulatory elements do not have NF-κB binding sites (unpublished data). One possible connection however, could be through Mef2 (Clark et al., 2013). Mef2 is an in vivo immune-metabolic switch controlled by NF-κB that can alternate between immune and metabolic gene expression. Upon infection, NF-κB activity recruits Mef2 as an immune regulator. A tempting hypothesis is that, by lowering NF-κB signaling under homeostatic conditions, Mef2 is freer to increase its involvement in metabolic activity.

Our results point to IMD/NF- $\kappa$ B signaling in the brain as a major determinant of *Drosophila* lifespan. The  $LT_{50}$  (84 days) of  $w^{1118}$ ; *repo-GAL4*; *UAS-Rel<sup>RNAi</sup>* is a statistically indistinguishable percent extension of  $LT_{50}$  compared with  $w^{1118}$ ; *methuselah* (Lin et al., 1998), lifespan extension by loss of insulin signaling (Clancy et al., 2001), or calorie restriction (Mair et al., 2003). Our data put under an evolutionary perspective studies in mice where a similar NF- $\kappa$ B-controlled immune-neuroendocrine integration led to modulation of hormone levels and lifespan extension (Zhang et al., 2013). However, our results go further to indicate that NF- $\kappa$ B signaling levels regulate both healthy aging as well as age-related neurodegenerative disease. Given the evolutionary conservation of NF- $\kappa$ B innate immune signaling in flies, mice, and humans, opposing the inflammatory effects of NF- $\kappa$ B may represent a common strategy to increase active lifespan in both the context of healthy aging as well as in cases of predisposition to age-related neurological disease.

## EXPERIMENTAL PROCEDURES

### *Drosophila* Stocks and Genetics

Flies were maintained on cornmeal-molasses medium at 25°C unless otherwise stated. For a complete list of the strains used, check the [Supplemental Experimental Procedures](#).

### Lifespan Studies and Production and Maintenance of Germ-free Flies

For lifespan studies, all fly strains were backcrossed for ten generations to their respective genetic background as recommended previously (He and Jasper 2014). When these “lifespan-ready” strains were established, cohorts of 20 flies (10 males and 10 females) were put in vials and monitored for their survival in 12 biological replicates ( $n = 240$ /strain). The flies were transferred to fresh food every 2 days. Germ-free flies were produced as described previously (Fernando et al., 2014) and checked every 5 days for bacterial contamination by performing PCR analysis on fly homogenates using 16S eubacterial primers (63F//1387R) as well as by culturing the homogenates on LB plates.

### Histology and Neurodegeneration Score

Histological analysis and determination of the neurodegeneration index were done as described previously (Cao et al., 2013). For a detailed description, check the [Supplemental Experimental Procedures](#).

### Gene Expression in Brains

Quantitative real-time PCR was used to measure mRNA expression. 30–40 fly brains were dissected at the indicated time points, and RNA was isolated using TrizolRT (Molecular Research Center) according to the manufacturer's instructions. cDNA was prepared from 0.5  $\mu$ g total RNA using the iScript cDNA synthesis kit (Bio-Rad). Real-time PCR was carried out using iQ SYBR Green Supermix (Bio-Rad). Primer sequences are presented in the [Supplemental Experimental Procedures](#).

### Gene Expression in Heads, the Rest of the Body, and Whole Flies

Total RNA was extracted from whole flies (6 females), the rest of the body (8 females), and heads (30 females) using the Total RNA Purification Plus kit (Norgen Biotek), and cDNA was prepared from 0.5  $\mu$ g total RNA using the Maxima First Strand cDNA synthesis kit (Thermo Scientific). Triplicate cDNA samples were amplified with the SensiFAST SYBR No-ROX kit (Bioline) in a Corbet Rotor-Gene 6000 qPCR machine (QIAGEN) according to the manufacturer's protocols. Primer sequences are presented in the [Supplemental Experimental Procedures](#).

### Statistical Analysis

All statistical analyses were performed using GraphPad Prism software (GraphPad). All qPCR data were analyzed using nonparametric unpaired

Student's t test corrected for multiple comparisons (Bonferroni correction). Significant differences between the survival data of different genotypes were identified using log rank and Wilcoxon tests (chi-square and p values). The neurodegeneration index and climbing assay data were analyzed using one- or two-way ANOVA with Tukey and Bonferroni post tests, respectively. In all tests,  $p < 0.05$  was considered significant.

## SUPPLEMENTAL INFORMATION

Supplemental Information includes Supplemental Experimental Procedures, six figures, and six tables and can be found with this article online at <http://dx.doi.org/10.1016/j.celrep.2017.04.007>.

## AUTHOR CONTRIBUTIONS

P.L., I.K., and S.C. designed the experiments. I.K. and S.C. performed the experiments with input from Y.C., M.H., and D.J. I.K., S.C., and P.L. analyzed the data with input from B.G. P.L. wrote the paper with input from I.K., S.C., and B.G.

## ACKNOWLEDGMENTS

We thank many colleagues for providing *Drosophila* stocks. We thank Aki Ikeda for use of his microtome facility, Ling Ling Ho for excellent technical help, Peter Burns for technical assistance, Maria Iossifidou for her help, members of the Ganetzky and Ligoxygakis labs for helpful discussions, and Daniel Babcock and David Wassarman for critical reading of the manuscript. We thank John Yoder (University of Alabama) for the use of his microscope facility and Janna Fierst (University of Alabama) for help with statistical tests. P.L. would like to dedicate this paper to the loving memory of our dear friend and colleague Thanasis Loukeris, the most sincere of scientists. He will forever keep a place in our hearts and minds. Work in Oxford was supported by the European Research Council (Consolidator Grant 310912 to P.L.). Work in Madison was supported by the NIH (grant R01 AG033620) and the Steenbock professorship (to B.G.).

Received: August 1, 2016

Revised: February 22, 2017

Accepted: March 31, 2017

Published: April 25, 2017

## REFERENCES

- Aggarwal, K., Rus, F., Vriesema-Magnuson, C., Ertürk-Hasdemir, D., Paquette, N., and Silverman, N. (2008). Rudra interrupts receptor signaling complexes to negatively regulate the IMD pathway. *PLoS Pathog.* 4, e1000120.
- Alic, N., Hoddinott, M.P., Foley, A., Slack, C., Piper, M.D., and Partridge, L. (2012). Detrimental effects of RNAi: a cautionary note on its use in *Drosophila* ageing studies. *PLoS ONE* 7, e45367.
- Alpatov, W.W., and Pearl, R. (1929). Experimental studies on the duration of life. XXI. Influence of temperature during the larval period and adult life on the duration of life of the imago of *Drosophila melanogaster*. *American Naturalist*. 63, 33–67.
- Aparicio, R., Neyen, C., Lemaitre, B., and Busturia, A. (2013). dRYBP contributes to the negative regulation of the *Drosophila* Imd pathway. *PLoS ONE* 8, e62052.
- Basbous, N., Coste, F., Leone, P., Vincentelli, R., Royet, J., Kellenberger, C., and Roussel, A. (2011). The *Drosophila* peptidoglycan-recognition protein LF interacts with peptidoglycan-recognition protein LC to downregulate the Imd pathway. *EMBO Rep.* 12, 327–333.
- Bharucha, K.N., Tarr, P., and Zipursky, S.L. (2008). A glucagon-like endocrine pathway in *Drosophila* modulates both lipid and carbohydrate homeostasis. *J. Exp. Biol.* 211, 3103–3110.
- Bosco-Drayon, V., Poidevin, M., Boneca, I.G., Narbonne-Reveau, K., Royet, J., and Charroux, B. (2012). Peptidoglycan sensing by the receptor PGRP-LE

- in the *Drosophila* gut induces immune responses to infectious bacteria and tolerance to microbiota. *Cell Host Microbe* 12, 153–165.
- Cantera, R., and Barrio, R. (2015). Do the genes of the innate immune response contribute to neuroprotection in *Drosophila*? *J. Innate Immun.* 7, 3–10.
- Cao, Y., Chtarbanova, S., Petersen, A.J., and Ganetzky, B. (2013). Dnr1 mutations cause neurodegeneration in *Drosophila* by activating the innate immune response in the brain. *Proc. Natl. Acad. Sci. USA* 110, E1752–E1760.
- Chinchore, Y., Gerber, G.F., and Dolph, P.J. (2012). Alternative pathway of cell death in *Drosophila* mediated by NF- $\kappa$ B transcription factor Relish. *Proc. Natl. Acad. Sci. USA* 109, E605–E612.
- Clancy, D.J., Gems, D., Harshman, L.G., Oldham, S., Stocker, H., Hafen, E., Leevers, S.J., and Partridge, L. (2001). Extension of life-span by loss of CHICO, a *Drosophila* insulin receptor substrate protein. *Science* 292, 104–106.
- Clark, R.I., Tan, S.W., Péan, C.B., Roostalu, U., Vivancos, V., Bronda, K., Pilátová, M., Fu, J., Walker, D.W., Berdeaux, R., et al. (2013). ME2 is an in vivo immune-metabolic switch. *Cell* 155, 435–447.
- de Magalhães, J.P., Curado, J., and Church, G.M. (2009). Meta-analysis of age-related gene expression profiles identifies common signatures of aging. *Bioinformatics* 25, 875–881.
- Deeks, S.G. (2011). HIV infection, inflammation, immunosenescence, and aging. *Annu. Rev. Med.* 62, 141–155.
- DiAngelo, J.R., Bland, M.L., Bambina, S., Chery, S., and Birnbaum, M.J. (2009). The immune response attenuates growth and nutrient storage in *Drosophila* by reducing insulin signaling. *Proc. Natl. Acad. Sci. USA* 106, 20853–20858.
- Dionne, M.S., Pham, L.N., Shirasu-Hiza, M., and Schneider, D.S. (2006). Akt and FOXO dysregulation contribute to infection-induced wasting in *Drosophila*. *Curr. Biol.* 16, 1977–1985.
- Donath, M.Y., and Shoelson, S.E. (2011). Type-2 diabetes as an inflammatory disease. *Nat. Rev. Immunol.* 11, 98–107.
- Fernando, M.D., Kounatidis, I., and Ligoxygakis, P. (2014). Loss of Trabid, a new negative regulator of the *Drosophila* immune-deficiency pathway at the level of TAK1, reduces life span. *PLoS Genet.* 10, e1004117.
- Franceschi, C., Capri, M., Monti, D., Giunta, S., Olivieri, F., Sevini, F., Panourgia, M.P., Invidia, L., Celani, L., Scurti, M., et al. (2007). Inflammaging and anti-inflammaging: a systemic perspective on aging and longevity emerged from studies in humans. *Mech. Ageing Dev.* 128, 92–105.
- Gäde, G., and Auerwald, L. (2003). Mode of action of neuropeptides from the adipokinet hormone family. *Gen. Comp. Endocrinol.* 132, 10–20.
- Giunta, B., Fernandez, F., Nikolic, W.V., Obregon, D., Rrapo, E., Town, T., and Tan, J. (2008). Inflammaging as a prodrome to Alzheimer's disease. *J. Neuroinflammation* 5, 51–66.
- Guntermann, S., Primrose, D.A., and Foley, E. (2009). Dnr1-dependent regulation of the *Drosophila* immune deficiency signaling pathway. *Dev. Comp. Immunol.* 33, 127–134.
- Guo, L., Karpac, J., Tran, S.L., and Jasper, H. (2014). PGRP-SC2 promotes gut immune homeostasis to limit commensal dysbiosis and extend lifespan. *Cell* 156, 109–122.
- He, Y., and Jasper, H. (2014). Studying aging in *Drosophila*. *Methods* 68, 129–133.
- Kaneko, T., Yano, T., Aggarwal, K., Lim, J.H., Ueda, K., Oshima, Y., Peach, C., Erturk-Hasdemir, D., Goldman, W.E., Oh, B.H., et al. (2006). PGRP-LC and PGRP-LE have essential yet distinct functions in the *drosophila* immune response to monomeric DAP-type peptidoglycan. *Nat. Immunol.* 7, 715–723.
- Kim, S.K., and Rulifson, E.J. (2004). Conserved mechanisms of glucose sensing and regulation by *Drosophila* corpora cardiaca cells. *Nature* 431, 316–320.
- Kim, M., Lee, J.H., Lee, S.-Y., Kim, E., and Chung, J. (2006). Caspar, a suppressor of antibacterial immunity in *Drosophila*. *Proc. Natl. Acad. Sci. USA* 103, 16358–16363.
- Kounatidis, I., and Ligoxygakis, P. (2012). *Drosophila* as a model system to unravel the layers of innate immunity to infection. *Open Biol.* 2, 120075–120089.
- Lee, G., and Park, J.H. (2004). Hemolymph sugar homeostasis and starvation-induced hyperactivity affected by genetic manipulations of the adipokinet hormone-encoding gene in *Drosophila melanogaster*. *Genetics* 167, 311–323.
- Lhocine, N., Ribeiro, P.S., Buchon, N., Wepf, A., Wilson, R., Tenev, T., Lemaitre, B., Gstaiger, M., Meier, P., and Leulier, F. (2008). PIMS modulates immune tolerance by negatively regulating *Drosophila* innate immune signaling. *Cell Host Microbe* 4, 147–158.
- Libert, S., Chao, Y., Chu, X., and Pletcher, S.D. (2006). Trade-offs between longevity and pathogen resistance in *Drosophila melanogaster* are mediated by NF $\kappa$ B signaling. *Aging Cell* 5, 533–543.
- Lin, Y.-J., Seroude, L., and Benzer, S. (1998). Extended life-span and stress resistance in the *Drosophila* mutant *methuselah*. *Science* 282, 943–946.
- Lin, Y., He, H., Luo, Y., Zhu, T., and Duan, R. (2015). Inhibition of transglutaminase exacerbates polyglutamine-induced neurotoxicity by increasing the aggregation of mutant ataxin-3 in an SCA3 *Drosophila* model. *Neurotox. Res.* 27, 259–267.
- Mair, W., Goymer, P., Pletcher, S.D., and Partridge, L. (2003). Demography of dietary restriction and death in *Drosophila*. *Science* 301, 1731–1733.
- Meinander, A., Runchel, C., Tenev, T., Chen, L., Kim, C.H., Ribeiro, P.S., Broemer, M., Leulier, F., Zvelebil, M., Silverman, N., and Meier, P. (2012). Ubiquitylation of the initiator caspase DREDD is required for innate immune signaling. *EMBO J.* 31, 2770–2783.
- Miquel, J., Lundgren, P.R., Bensch, K.G., and Atlan, H. (1976). Effects of temperature on the life span, vitality and fine structure of *Drosophila melanogaster*. *Mech. Ageing Dev.* 5, 347–370.
- Moreno, B., Jukes, J.P., Vergara-Irigaray, N., Errea, O., Villoslada, P., Perry, V.H., and Newman, T.A. (2011). Systemic inflammation induces axon injury during brain inflammation. *Ann. Neurol.* 70, 932–942.
- Moskalev, A., and Shaposhnikov, M. (2011). Pharmacological inhibition of NF- $\kappa$ B prolongs lifespan of *Drosophila melanogaster*. *Aging (Albany NY)* 3, 391–394.
- Ouchi, N., Parker, J.L., Lugus, J.J., and Walsh, K. (2011). Adipokines in inflammation and metabolic disease. *Nat. Rev. Immunol.* 11, 85–97.
- Paquette, N., Broemer, M., Aggarwal, K., Chen, L., Husson, M., Erturk-Hasdemir, D., Reichhart, J.M., Meier, P., and Silverman, N. (2010). Caspase-mediated cleavage, IAP binding, and ubiquitination: linking three mechanisms crucial for *Drosophila* NF- $\kappa$ B signaling. *Mol. Cell* 37, 172–182.
- Paredes, J.C., Welchman, D.P., Poidevin, M., and Lemaitre, B. (2011). Negative regulation by amidase PGRPs shapes the *Drosophila* antibacterial response and protects the fly from innocuous infection. *Immunity* 35, 770–779.
- Petersen, A.J., Katzenberger, R.J., and Wassarman, D.A. (2013). The innate immune response transcription factor relish is necessary for neurodegeneration in a *Drosophila* model of ataxia-telangiectasia. *Genetics* 194, 133–142.
- Rera, M., Clark, R.I., and Walker, D.W. (2012). Intestinal barrier dysfunction links metabolic and inflammatory markers of aging to death in *Drosophila*. *Proc. Natl. Acad. Sci. USA* 109, 21528–21533.
- Salminen, A., Kaarniranta, K., and Kauppinen, A. (2012). Inflammaging: disturbed interplay between autophagy and inflammasomes. *Aging (Albany NY)* 4, 166–175.
- Shibata, T., Sekihara, S., Fujikawa, T., Miyaji, R., Maki, K., Ishihara, T., Koshiba, T., and Kawabata, S. (2013). Transglutaminase-catalyzed protein-protein cross-linking suppresses the activity of the NF- $\kappa$ B-like transcription factor relish. *Sci. Signal.* 6, ra61.
- Silverman, N., Zhou, R., Erlich, R.L., Hunter, M., Bernstein, E., Schneider, D., and Maniatis, T. (2003). Immune activation of NF- $\kappa$ B and JNK requires *Drosophila* TAK1. *J. Biol. Chem.* 278, 48928–48934.
- Stoven, S., Silverman, N., Junell, A., Hedengren-Olcott, M., Erturk, D., Engstrom, Y., Maniatis, T., and Hultmark, D. (2003). Caspase-mediated processing of the *Drosophila* NF- $\kappa$ B factor Relish. *Proc. Natl. Acad. Sci. USA* 100, 5991–5996.

- Thevenon, D., Engel, E., Avet-Rochex, A., Gottar, M., Bergeret, E., Tricoire, H., Benaud, C., Baudier, J., Taillebourg, E., and Fauvarque, M.O. (2009). The *Drosophila* ubiquitin-specific protease dUSP36/Scny targets IMD to prevent constitutive immune signaling. *Cell Host Microbe* 6, 309–320.
- Tsichritzis, T., Gaentzsch, P.C., Kosmidis, S., Brown, A.E., Skoulakis, E.M., Ligoxygakis, P., and Mosialos, G. (2007). A *Drosophila* ortholog of the human cylindromatosis tumor suppressor gene regulates triglyceride content and antibacterial defense. *Development* 134, 2605–2614.
- Tsuda, M., Langmann, C., Harden, N., and Aigaki, T. (2005). The RING-finger scaffold protein Plenty of SH3s targets TAK1 to control immunity signalling in *Drosophila*. *EMBO Rep.* 6, 1082–1087.
- Tzou, O., Ohresser, S., Ferrandon, D., Capovilla, M., Reichhart, J.M., Lemaitre, B., Hoffmann, J.A., and Imler, J.L. (2000). Tissue-specific inducible expression of antimicrobial peptide genes in *Drosophila* surface epithelia. *Immunity* 13, 737–748.
- Waterson, M.J., Chung, B.Y., Harvanek, Z.M., Ostojic, I., Alcedo, J., and Pletcher, S.D. (2014). Water sensor ppk28 modulates *Drosophila* lifespan and physiology through AKH signaling. *Proc. Natl. Acad. Sci. USA* 111, 8137–8142.
- Zhang, G., Li, J., Purkayastha, S., Tang, Y., Zhang, H., Yin, Y., Li, B., Liu, G., and Cai, D. (2013). Hypothalamic programming of systemic ageing involving IKK- $\beta$ , NF- $\kappa$ B and GnRH. *Nature* 497, 211–216.

**Cell Reports, Volume 19**

**Supplemental Information**

**NF- $\kappa$ B Immunity in the Brain Determines  
Fly Lifespan in Healthy Aging  
and Age-Related Neurodegeneration**

**Ilias Kounatidis, Stanislava Chtarbanova, Yang Cao, Margaret Hayne, Dhruv Jayanth, Barry Ganetzky, and Petros Ligoxygakis**

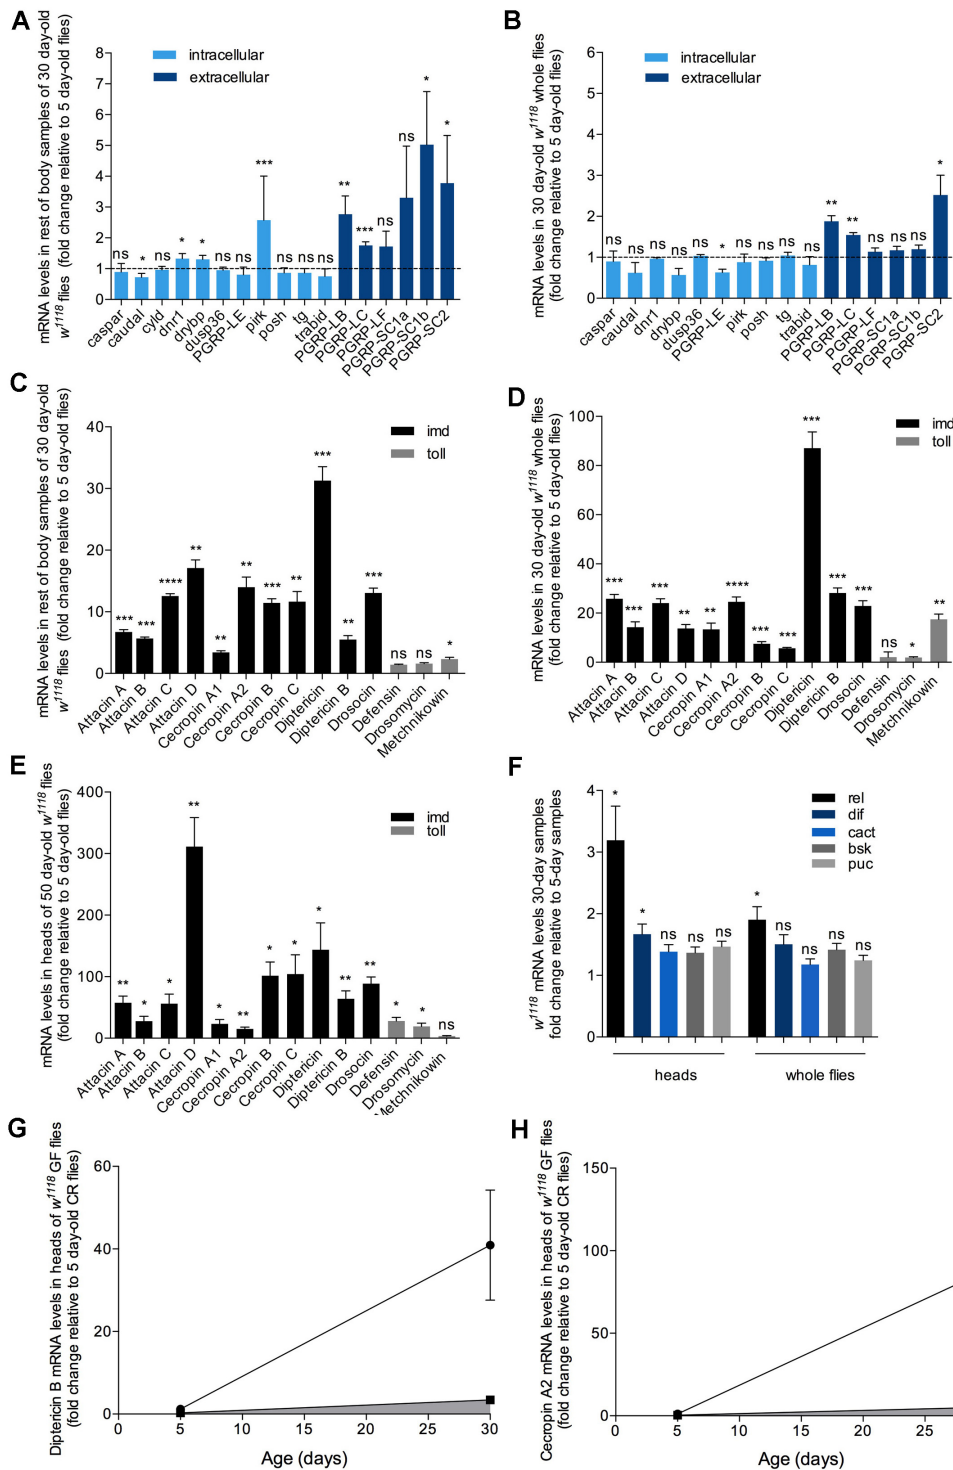

**Figure S1 related to Figure 1.**

**Figure S1. Expression of immunity genes in conventionally reared flies.** Gene expression of intracellular negative regulators of IMD stays unaltered in the rest of the body (A) and in whole flies (B) in 30-day old adults. In contrast, gene expression of extracellular negative regulators was increased in the rest of the body (A) and whole flies (B). This pattern was accompanied by a large increase in AMP gene expression in rest of bodies (C) and whole flies (D). (E) AMP gene expression levels in 50-day old *w<sup>1118</sup>* fly heads. (F) Gene expression of *rel* as well as TOLL and JNK pathway components in 30-day old *w<sup>1118</sup>* flies. Asterisks denote statistically significant differences (\*  $p \leq 0.05$ ; \*\*  $p \leq 0.01$ ; \*\*\*  $p \leq 0.001$ ; \*\*\*\*  $p \leq 0.0001$ ; ns, non-significant). Values shown are mean  $\pm$  SEM. To identify the component of AMP increase that was microbe-independent during aging we plotted Diptericin-B levels (G) and Cecropin A2 levels (H) during aging, in conventionally reared (CR) flies (solid circles) and germ free (GF) flies (solid squares). Values shown are mean  $\pm$  SEM.



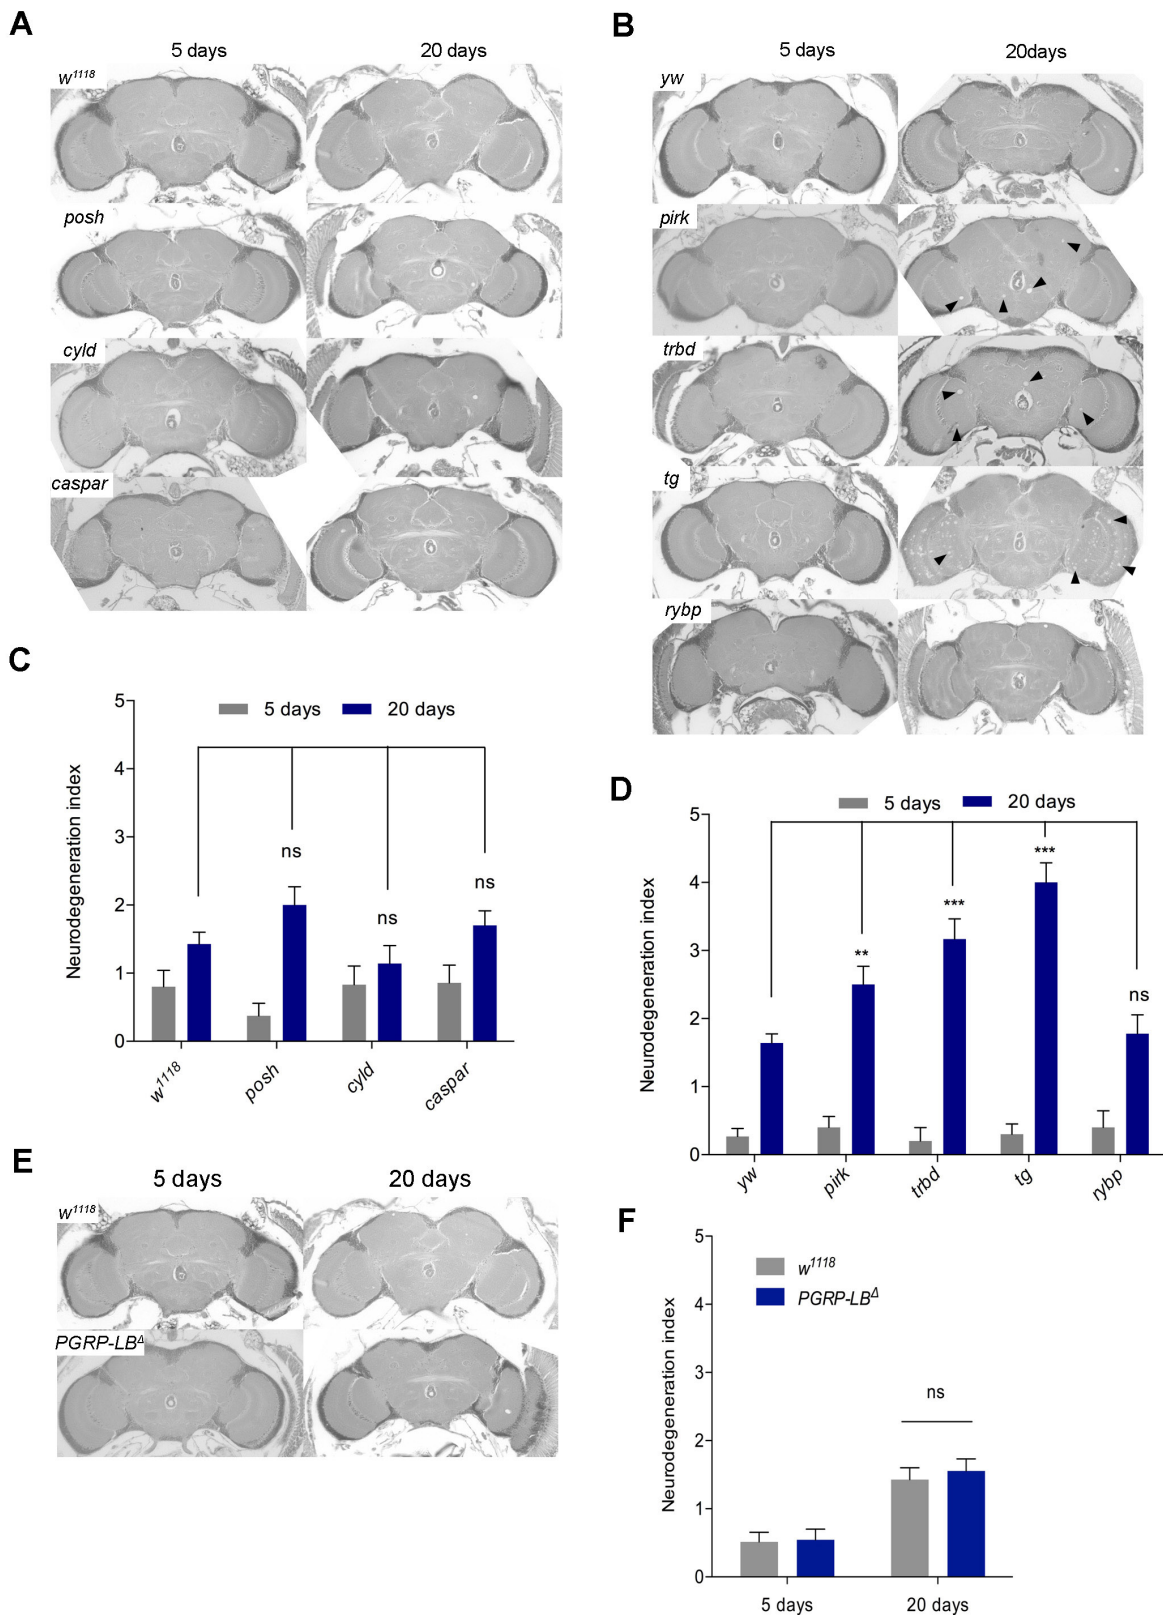

Figure S2 related to Figure 3.

**Figure S2. Screening mutants of IMD pathway intracellular negative regulators for neurodegeneration in conditions of accelerated ageing (29°C).** Several mutants for intracellular regulators were found to have age-dependent neurodegeneration [midbrain sections (A, B) and index (C, D)]. In contrast, neuropathology in mutants for the extracellular negative regulator PGRP-LB did not differ from controls [midbrain sections (E) and index (F)]. Values shown are mean  $\pm$  SEM (\*  $p \leq 0.05$ ; \*\*\*  $p \leq 0.001$ ; ns, non-significant).

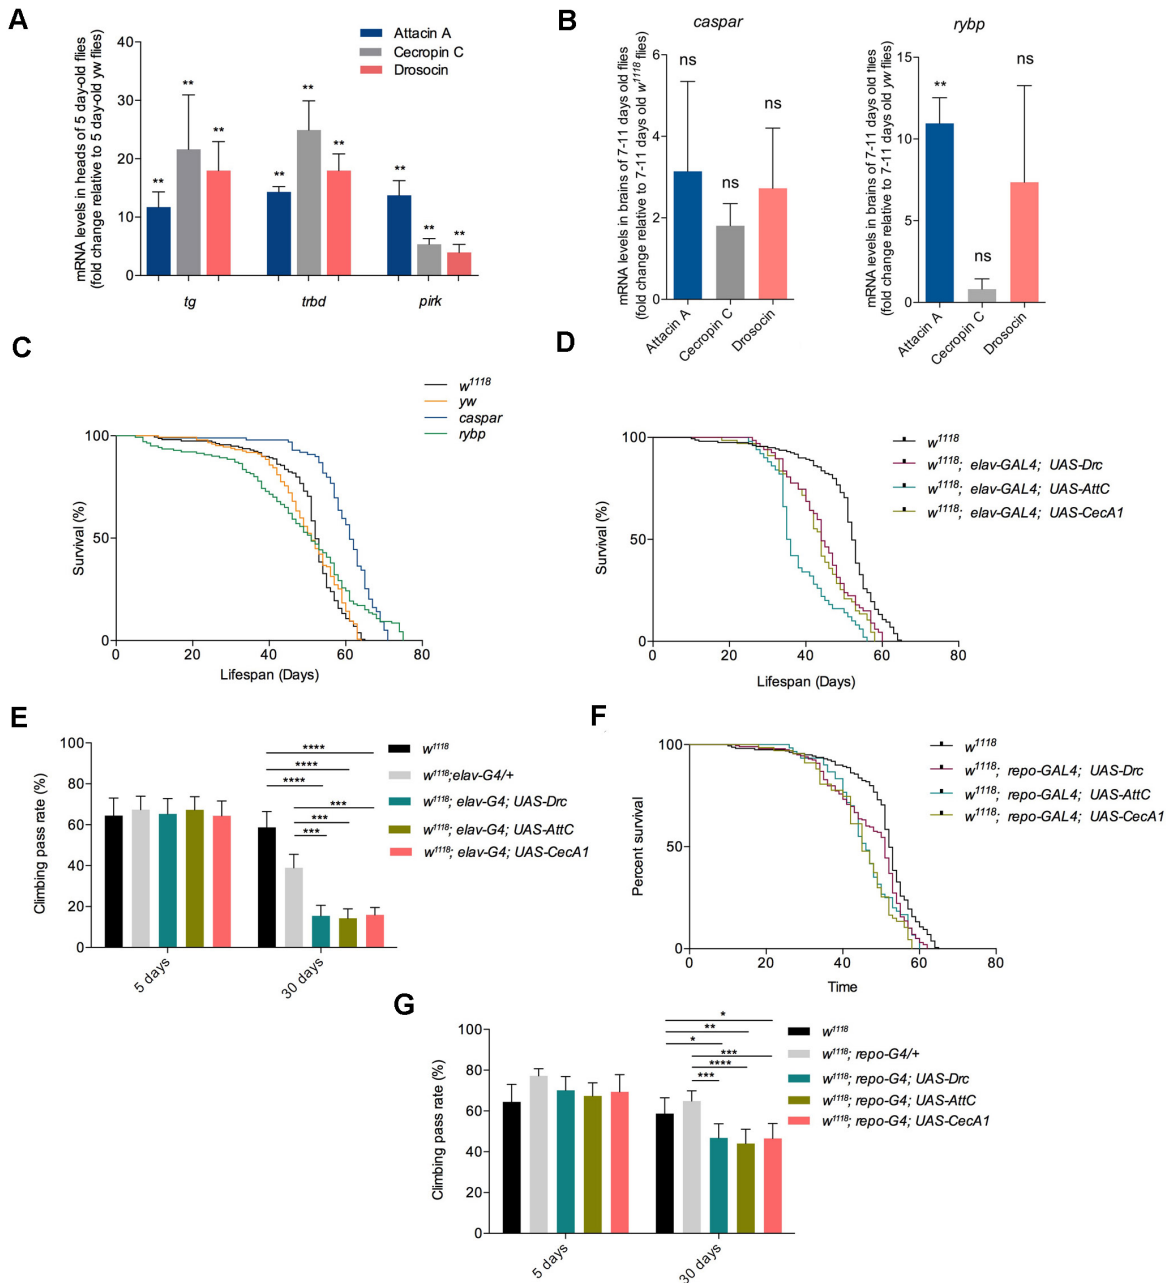

Figure S3 related to Figures 3 and 4.

Figure S3. AMPs expression in Imd negative regulator mutants, lifespan of *rybp* and *caspar* mutants and the effect of expressing individual AMPs on lifespan and locomotor activity. (A) Statistically significant increase in AMP gene expression was observed from an early age (5-day old flies) in *tg*, *trbd* and *pirk* mutants. In contrast, no important changes in brain AMPs gene expression (B), nor reduction in lifespan (C) were observed for *rybp* and *caspar* mutants, which did not exhibit early onset neurodegeneration. Expressing individual AMPs in neurons significantly reduced lifespan (D) and locomotion (E). Similarly, AMP expression in glia compromised lifespan (F) and locomotor activity (G). Values shown are mean  $\pm$ SEM (\*\*  $p \leq 0.01$ ; ns, non-significant).

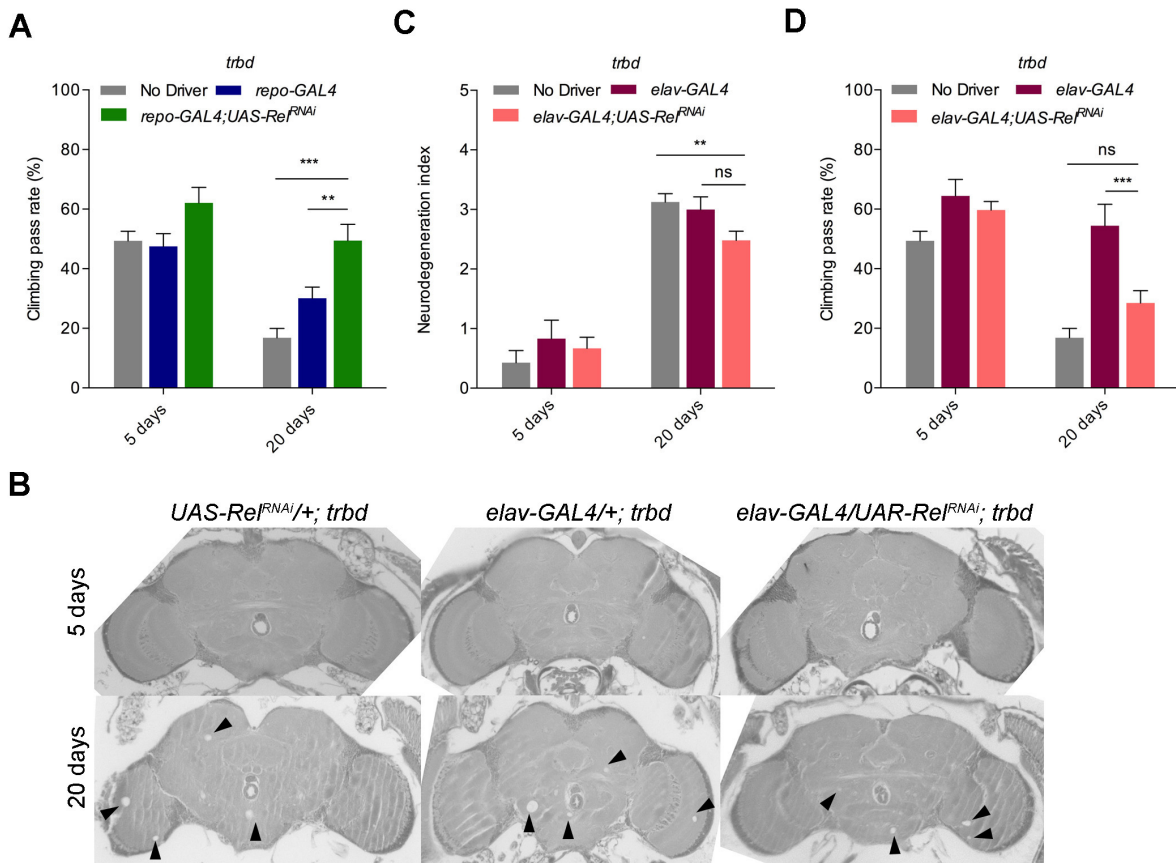

Figure S4 related to Figure 5.

**Figure S4. Silencing *rel* expression in glia rescues *trbd* mutants.** Locomotor activity was rescued by silencing *rel* in glia of *trbd* mutants (A). In contrast, upon *rel* silencing in neurons neurodegeneration was only modestly reduced (B for sections, C for index) and locomotor activity was not rescued (D). Values shown are mean  $\pm$ SEM (\*  $p \leq 0.05$ ; \*\*  $p \leq 0.01$ ; \*\*\*  $p \leq 0.001$ ; ns, non-significant).

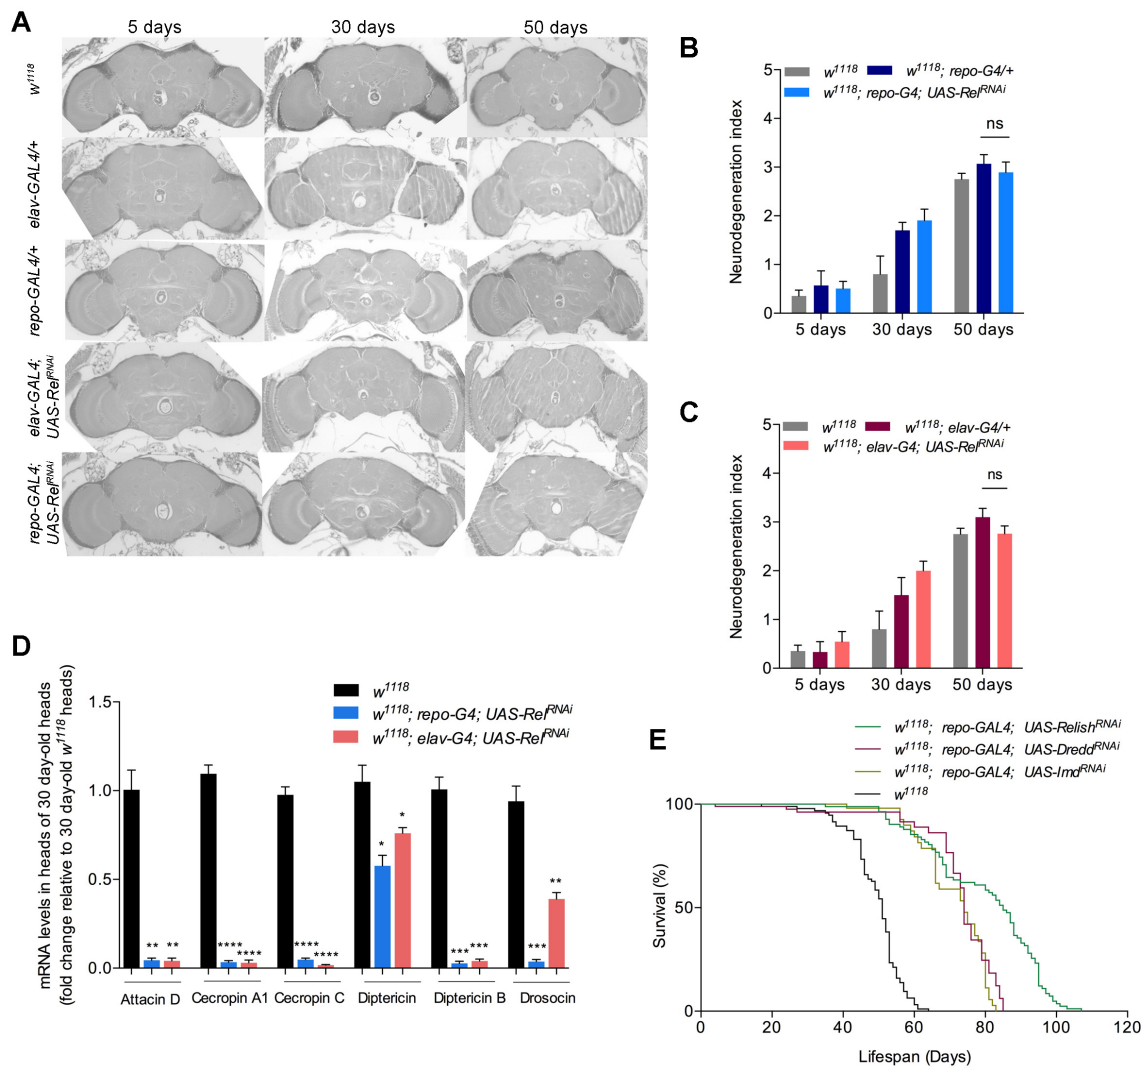

Figure S5 related to Figure 6.

**Figure S5. Suppression of *rel* expression in brains of wild type flies.** Silencing *rel* via RNAi in glia or neurons did not affect the age-dependent neurodegeneration in wild-type flies (A for sections; B and C for index). Both, neuronal and glial suppression of *rel* resulted in reduced AMP levels in heads of 30-day old *w<sup>1118</sup>* flies (D). (E) Lifespans of mated females, where *rel*, *Dredd* and *Imd* were silenced in glia. Values shown are mean  $\pm$ SEM (\*  $p \leq 0.05$ ; \*\*  $p \leq 0.01$ ; \*\*\*  $p \leq 0.001$ ; \*\*\*\*  $p \leq 0.0001$ ; ns, non-significant).

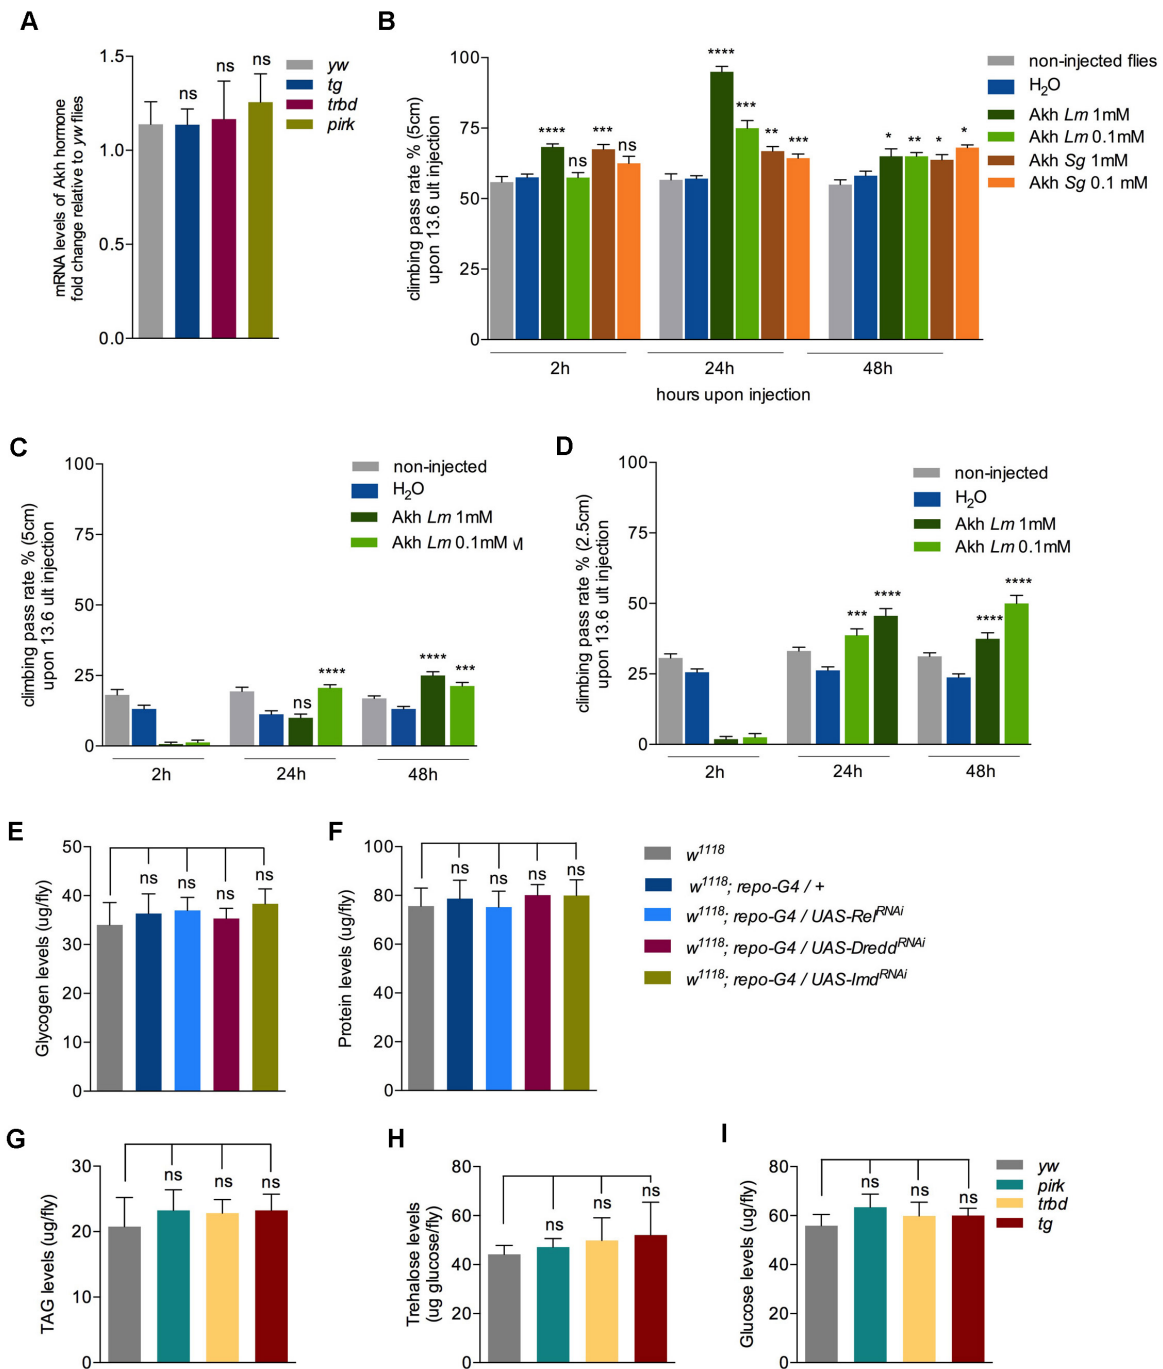

Figure S6 related to Figure 7.

**Figure S6. Increased locomotor activity upon injection of Adipokinetic hormone.** There was no change in endogenous *akh* gene expression levels in *tg*, *trbd* or *pirk* mutants (A). There was increased locomotor activity in 30-day old *w<sup>1118</sup>* flies (B) and in 50-day old *w<sup>1118</sup>* flies (C- 5cm pass height; D - 2.5 cm pass height) flies injected with 13.6 ml Adipokinetic Hormone from *Locusta migratoria* or *Schistocera gregaria*. Glycogen (E) and protein (F) levels of flies where *rel*, *Dredd* and *Imd* were silenced in glia were statistically indistinguishable from the control. This was also the case for TAGs (G) trehalose (H) and glucose (I) for mutants of *tg*, *trbd* and *pirk*. Values shown are mean  $\pm$  SEM (\*  $p \leq 0.05$ ; \*\*  $p \leq 0.01$ ; \*\*\*  $p \leq 0.001$ ; \*\*\*\*  $p \leq 0.0001$ ; ns, non-significant).

## Supplemental Experimental Procedures

### List of *Drosophila* strains

$w^{1118}$  (BL #6326) and  $yw67c23$  (BL #6599), were used as controls and for the genetic background of all the other strains used in these studies;  $w^{1118};Dredd^{EP1214}$  (BL #10456),  $yw67c23;Dredd^{B118}$  (BL #55712)  $w^{1118};;relish^{E20}$  (BL #55714)  $w^{1118};;repo-GAL4$  (BL #7415),  $yw67c23;Tg^{EY05203}$  (BL #15787),  $w^{1118};POSH^{EP2248}$  (BL #17036),  $w^{1118};caspar$  (BL #11373) were obtained from Bloomington Stock Center,  $w^{1118};CylD^{00814}$  was obtained from the Exelixis Collection and backcrossed into the  $w^{1118}$  background,  $w^{1118};UAS-relish^{RNAi}$  (VDRC #49414)  $w^{1118};UAS-dredd^{RNAi}$  (VDRC #28041)  $w^{1118};;UAS-imd^{RNAi}$  (VDRC #1284) were obtained from the Vienna Drosophila RNAi Center;  $yw67c23;trabid$  was obtained from Mariann Bienz (MRC Laboratory of Molecular Biology, Cambridge, United Kingdom) and backcrossed into the  $yw67c23$  background,  $yw67c23;dRYBP^{Δ55}/CyO$  was obtained from Ana Busturia (Centro de Biología Molecular “Severo Ochoa” CSIC-UAM, Madrid, Spain),  $w^{1118};np1-GAL4$  was obtained from Heinrich Jasper (Buck Institute for Research on Aging, Novato, CA, USA),  $w^{1118};elav-GAL4$  was obtained from Efthimios Skoulakis (BSRC Alexander Fleming, Vari, Greece);  $w^{1118};PGRP-LB^A$ ,  $w^{1118};UAS-Atta$ ,  $w^{1118};UAS-CecA$ ,  $w^{1118};UAS-Drc$  were obtained from Bruno Lemaitre (Global Health Institute, EPFL, Lausanne, Switzerland). *Attacin-GFP* was obtained from David Wassarman (Laboratory of Genetics, University of Wisconsin-Madison).

### Histology and neurodegeneration protocols

Briefly, flies were collected at 0-3 days of eclosion and aged at the respective temperatures (25°C or 29°C). Fly heads were severed and placed in fresh Carnoy’s fixative (ethanol: chloroform: glacial acetic acid at the ratio 6:3:1) overnight at 4°C. Heads were then washed and placed in 70% ethanol and processed into paraffin using standard histological procedures. Embedded heads were sectioned at 5µm, and stained with hematoxylin and eosin. Images were taken under a Nikon light microscope (Nikon, Japan), equipped with a QImaging camera and images were generated using QImaging software (QImaging company, Canada) and processed with Photoshop CS5. Neurodegeneration is indicated by the appearance of vacuolar lesions in the brain neuropil. Six levels of neurodegeneration (0, 1, 2, 3, 4 and 5) are defined for quantification as previously described (Cao et al, 2013). The higher number indicates more severe neurodegeneration. For all samples, scoring of the neurodegeneration index was done blindly with respect to genotype. For sample size for each genotype see Supplemental Table.

### Adipokinetic hormone injection assays

13.6 µl of Adipokinetic hormone II from *Locusta migratoria* (Abcam Biochemicals, UK) or from *Schistocera gregaria* (Abcam Biochemicals, UK) diluted in sterile water was injected in the thorax of adult flies using a micro-injector (Drummond Scientific, Nanoject II, USA) coupled to a fine glass needle. Control flies of same age were injected with 13.6 µl of sterile water.

### Weight quantification

Total body weight of 10 individual flies was determined for each genotype. Each fly was then placed in an empty 2 ml eppendorf tube. The cap was left open and the flies were placed in a drying oven (70°C) with air blown through the chamber. The flies were left to dry for 24 hour and the dry mass was calculated. All measurements were made with a microbalance (Discovery, Ohaus, Switzerland).

### Nutrient level assays

For all nutrient measurements, flies were frozen at -80 °C and homogenized in groups of five in 200 µl PBS + 0.05% Triton X-100. Samples were centrifuged at 1,000 × g for 2 mins to settle debris. All reactions were read with a micro-volume UV-Vis spectrophotometer (Nanodrop 1000, Thermo Scientific, UK).

For triacylglyceride (TAG) measurement, 10cm µl homogenate was placed in 200 µl triacylglyceride working reagent (Sigma-Aldrich, UK), spun down briefly in a micro-centrifuge following a 5-min incubation at 37°C and read at 540 nm compared with glycerol standards.

For glucose measurement, 10 µl homogenate was placed in 150 µl warmed Glucose reagent (Sigma-Aldrich, UK), spun down briefly in a micro-centrifuge following a 5-min incubation at 30°C and read at 340 nm compared with glucose standards

For protein measurement, 10 µl homogenate was placed in 200 µl of working reagent of Pierce™ BCA Protein Assay Kit (Fischer Scientific, UK) following the manufacturer’s protocol and read at 562 nm compared with BSA standards.

### Food intake measurement

Flies were transferred to food 0.05% blue dye (FD&C Blue 80717 Sigma-Aldrich, UK), ten flies per sample. Flies were allowed to consume dyed food for 6 h and then were homogenized in 200 µL PBS + 0.05% Triton X-100 (PBST), centrifuged at 1,000 × g for 1 min to settle debris, and then 100 µL supernatant was read directly at 630 nm (reference wavelength of 670 nm) and compared with blue dye standards.

### **Behaviour assay**

A negative geotaxis (climbing) assay was used to locomotor activity. The assay was performed in a room with controlled temperature of 21°C. For experiments presented in Figures 1, 3 and 5, groups of 10-30 flies from both sexes of each indicated genotype were collected at 0-3 days of eclosion and aged at 25°C. For experiments presented in Figure 4 and Figure S4, groups of 7-20 flies from both sexes of each indicated genotype were collected at 0-3 days of eclosion and aged at 29°C. For experiments presented in Figure S6, groups of 20 flies from both sexes of each indicated genotype were collected at 0-3 days eclosion, aged at 25°C and injected at the indicated age. In all experiments, flies were placed in the testing apparatus, consisting of two empty plastic vials taped together, and allowed to recover for 1 min. Next, flies were tapped to the bottom and let climb on the wall of the testing apparatus for 10 seconds. The number of flies that climbed over a 5cm line in 10 seconds was recorded. An additional series of tests using a 2.5cm line was followed for 50 day-old flies upon AKH hormone injections. The paradigm was repeated 5 times with 1 min of recovery between trials. Climbing pass rate was calculated by converting in percentage the average number of flies that climbed in all 5 trials. The number of independent replicates (n) and total number of flies tested for each genotype is presented in the Supplemental Table. Assays were performed on subsets of flies from vials used in the longevity experiments.

### **Single pair mating assays**

One sexually naïve male was placed in a courtship chamber with one virgin receptive female and the pair was video recorded until the completion of mating. To attain a sexually experienced male, a 5-day old sexually naïve male was mated to a virgin female followed by a 30–45 min recuperation time at 25°C. The experienced male was then transferred to a new mating chamber with a virgin female and the pair was recorded until the completion of mating. Courtship index (CI) was estimated as the proportion of time a male spent courting (orientation, following, wing vibrations and abdomen bends) relative to the mating latency. Frequency and percent duration of wing extensions performed towards the female were calculated relative to the total male courting time. Abdomen bends included partial to full abdomen curvature when the male was oriented behind the female. Frequency of abdomen bends was estimated by recording the number of abdomen bends performed by the male and standardizing to courting time ( $N=20$ ).

### **Immunohistochemistry**

Fly brains were dissected in PBS1X and fixed in 4%PFA in PBS1X for 30 min, washed 3 successive times in PBS-Triton 0.03%, incubated 1h at room temperature in blocking solution (PBST, BSA 0.1%). Subsequently samples were incubated over night at 4°C with primary antibodies diluted in blocking solution. Samples were next washed 3 times with PBS-Triton 0.01% and incubated with secondary antibodies for 3h at room temperature. After 3 successive washes with PBS-Triton 0.01%, brains were mounted in Vectashield mounting medium and analyzed under confocal microscope Zeiss LSM510. Images were acquired with the Zeiss ZEN software and processed using Image J. The following primary antibodies were used: mouse anti-Repo (1:100) (#8D12, Developmental Studies Hybridoma Bank, University of Iowa, Iowa City, IA), rat anti-Elav (1:100) (#7E8A10, Developmental Studies Hybridoma Bank, University of Iowa, Iowa City, IA), and chicken anti-GFP (1:500), Life Technologies, Carlsbad, CA (reference #A10262). The following secondary antibodies were used at 1:500 dilutions: Alexa488-conjugated goat anti-chicken (Life Technologies, Carlsbad, CA, reference # A11039), Alexa633-conjugated goat anti-rat (Life Technologies, Carlsbad, CA, reference #A21094) and Alexa568-cojugated goat anti-mouse (Life Technologies, Carlsbad, CA, reference #A11021). DAPI (Sigma-Aldrich, St. Louis, MO) was added to the last PBS-Triton 0.01% wash prior mounting at the concentration of 1 mg/L.

### **Gene Expression Analysis – ddCT Method**

Expression values were calculated using the DDCT method and normalized to rp49 expression levels. There are several methods of reporting real-time PCR data including absolute or relative expression levels. Absolute expression provides the exact copy number following transformation of the data via a standard curve. The data are typically presented as copy number per cell. In relative quantification, the real-time PCR data is presented relative to another gene often referred to as an internal control. Absolute quantification is required when a precise quantity of amplicon is desired, for example, calculation of viral load. The disadvantage of absolute quantification includes the increased effort to generate standard curves. Furthermore, it is often unnecessary to present data as absolute copy number and relative expression will suffice.

Several methods have been developed in order to present the relative gene expression. The efficiency correction method calculates the relative expression ratio from the real-time PCR efficiencies and the Real-time PCR data has been analyzed using the so-called sigmoidal curve fitting methods that fit the experimental data to an empirical equation and results in the prediction of the PCR efficiency and an estimate of the initial copy number of the amplicon.

Another method is the comparative ddCT method which makes several assumptions, including that the efficiency of the PCR is close to 1 and the PCR efficiency of the target gene is similar to the internal control gene.

There are advantages and disadvantages to each of the methods to analyze relative real-time PCR data. An advantage of the efficiency correction method is that the PCR efficiency of the target and internal control genes are included in the equation. The sigmoidal curve fitting models have the advantage that PCR efficiency does not need to be calculated by a separate experiment and is estimated during the analysis. Advantages of the comparative ddCT method include ease of use and the ability to present data as 'fold change' in expression

Disadvantages of the comparative CT method include the assumptions of PCR efficiency (alternatively the PCR must be further optimized) and the use of nonlinear regression analysis for the calculations. In our case, all of our primers' efficiencies were previously checked showing an efficiency of over 95%.

For more details please check the following references, Livak *et al*, 2001; Pfaffl 2001; Schmittgen *et al*, 2008.

Results are shown as Average  $\pm$  SD of at least 3 independent biological samples.

### List of primers

akh forw: TCCCAAGAGCGAAGTCCTCA  
akh rev: CCAGAAAGAGCTGTGCCTGA  
attacin A forw: CTCCTGCTGGAAAACATC  
attacin A rev: GCTCGTTTGGATCTGACC  
attacin B forw: GGGTAATATTTAACCGAAGT  
attacin Brev: GTGCTAATCTCTGGTCATC  
attacin C forw: CTGCACTGGACTACTCCCACATCA  
attacin C rev: CGATCCTGCGACTGCCAAAGATTG  
attacin D forw: AGTGGGGGTCCTAGGGTTC  
attacin D rev: GTGGCGTTGAGGTTGAGATT  
basket forw: CACCAACACTACACCGTCGA  
basket rev: AAGCGGCGCATACTATTCTT  
caspar forw: GAATCTTGTGGAGGCTCTAAGTC  
caspar rev: GCACCAGGATAGGATGGGGA  
caudal forw: CCATCGAAGCCGCCATACT  
caudal rev: TTTGCCTGGTTGTGGTTGTG  
cecropin A1 forw: CATTGGACAATCGGAAGCTGGGGTG  
cecropin A1 rev: TAATCATCGTGGTCAACCTCGGGC  
cecropin A2 forw: ATTAGATAGTCATCGTGGTT  
cecropin A2 rev: GTGTTGGTCAGCACACT  
cecropin B forw: GAACGCATTGGTCAGCTAC  
cecropin B rev: AGCGGTGGCTGCAACATT  
cecropin C forw: TGTAAGCTAGTTTATTTCTATGG  
cecropin C rev: GATGAGCCTTTAATGTCC  
cyld forw: ATCGAGGTAGAAGACGAATCCA  
cyld rev: GCATCTGTTGGCTGGTACAAAA  
dif forw: GGAGCCGACAAGCAATATAATCC  
dif rev: GTAGTTGCACACTTCGATGGT  
diptericin forw: ACCGCAGTACCCACTCAATC  
diptericin rev: GGTCCACACCTTCTGGTGAC  
diptericin B forw: AGGATTTCGATCTGAGCCTCAACGG  
diptericin B rev: TGAAGGTATACACTCCACCGGCTC  
dnr1 forw: CATTGTCAACCTGCCAAC  
dnr1 rev: GCGACAGACCTTCTCCAGAC  
dredd forw: CAAAAGGTGGGCCTCTGCT  
dredd rev: GTAGGTGGCATCCGAGTGGT  
drosocin forw: GTTCACCATCGTTTTCC  
drosocin rev: CCACACCCATGGCAAAAAC  
drosocin forw (brain qPCR): CACCCATGGCAAAAACGC  
drosocin rev (brain qPCR): TGAAGTTCACCATCGTTTTCCCTG  
drosomycin forw: AGTACTTGTTTCGCCCTCTTCGCTG  
drosomycin rev: CCTTGTATCTTCCGGACAGGCAGT  
rybp forw: CATGTTGACACCTGGCTCCTG  
rybp rev: CGAAGGTGATCGAGGAGAAC  
dUSP36 forw: CAACACCTGCTACCTCAACTC  
dUSP36 rev: CTGCTCCGAAACGAGCCAAT  
Myd88 forw: ATCTGGAACACTTCCTGGGC



Myd88 rev: CCACGAGAGCAGTCTGTCG  
PGRP-LB forw: CTTGTTTGTGTTTATTTTTGTG  
PGRP-LB rev: CGGTAACCGTCGAGGC  
PGRP-LC forw: TCCAATCGAAATCGGAAGAG  
PGRP-LC rev: GGCGAAGATGTCTTTCCAAC  
PGRP-LE forw: GATGCCGACCAAAAATACCAG  
PGRP-LE rev: GTCTTCGAAATGTGTCCGAG  
PGRP-SC1a forw: AAGCGATCGTCAACTATTACAGC  
PGRP-SC1a rev: GAGAGCCACTTTGGAAACCA  
PGRP-SC1b forw: AGCTTCCTGGGCAACTACAA  
PGRP-SC1b rev: GAGATCATGTTCCGGCTCCAG  
PGRP-SC2 forw: TGACCATCATCTCCAAGTCG  
PGRP-SC2 rev: CAGCGAGGTCTTGCTCGT  
pirk forw: CGATGACGAGTGCTCCAC  
pirk rev: TGCTGCCCAGGTAGATCC  
posh forw: CACACGTAAACGACCTGTTG  
posh rev: GCATCGCAACTTGTGCTGAC  
relish forw: ACAGGACCGCATATCG  
relish rev: GTGGGGTATTTCCGGC  
rp49 forw: AAGAAGCGCACCAAGCACTTCATC  
rp49 rev: TCTGTTGTCGATACCCTTGGGCTT  
rp49 forw (brain qPCR): GACGCTTCAAGGGACAGTATCTG  
rp49 rev (brain qPCR): AAACGCGGTTCTGCATGAG  
tg forw: CATACGAGTCACTTCTATGCG  
tg rev: CTTCAGCCGGAAGGGTTCTC  
trbd forw: ATGTGAAACTTGCACCTACGAG  
trbd rev: GCGACATTACGGCTACTTCG

#### **Supplemental References**

Livak K.J., and Schmittgen, T.D. 2001. Analysis of relative gene expression data using Real-Time Quantitative PCR and the  $2^{-\Delta\Delta CT}$  method. *Methods* 25(4): 402-8.

Pfaffl M.W. 2001. A new mathematical model for relative quantification in real-time RT-PCR. *Nucleic Acids Res* (29)9: e45.

Schmittgen, T.D. and Livak K.J. 2008. Analyzing real-time PCR data by the comparative CT method. *Nature Protocols* 3(6): 1101-8.
